# Supplementary material for: Picoplanktonic methane production in eutrophic surface waters
Source: Copernicus journal article supplement (doi:10.5194/bg-2023-185), 2023-10-09
Supplement: Supplementary file [file bg-2023-185-RC1-supplement.pdf]

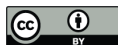

# 1 Picoplanktonic methane production in eutrophic surface waters

2 Sandy E. Tenorio<sup>1, 2, 4</sup>, Laura Farías<sup>1, 2, 3</sup>

3 <sup>1</sup>Departamento de Oceanografía, Facultad de Ciencias Naturales y Oceanográficas, Universidad de Concepción, Concepción,  
4 4070043, Chile.

5 <sup>2</sup>Centro de Ciencia del Clima y la Resiliencia (CR2), Chile.

6 <sup>3</sup>Instituto Milenio en Socio-ecología Costera (SECOS), Chile.

7 <sup>4</sup>Programa de Graduados en Oceanografía, Departamento de Oceanografía, Universidad de Concepción, Concepción,  
8 4070043, Chile.

9

10 *Correspondence to:* Laura Farías (laura.farias@udec.cl)

11 **Abstract.** In the last decade, there have been several research articles on the methane paradox (aerobic CH<sub>4</sub> production) first  
12 described in the 1960s. In this study, we present observations of CH<sub>4</sub> supersaturation in the surface layer in the central Chile  
13 upwelling zone (36° S, 73° W) throughout two seasonal cycles (2018-2021). Additionally, CH<sub>4</sub> cycling experiments were  
14 performed using plankton fractions (natural planktonic community, <150, <3 and <0.2 μm) in a seasonal phytoplankton  
15 succession. Our findings highlight the significant role of picoplankton (<3 μm) in CH<sub>4</sub> production on the ocean surface,  
16 contrasting with the limited involvement of larger organisms (<150 μm). Incubations with methylated substrates such as  
17 methylphosphonic acid (MPn) and trimethylamine (TMA) stimulated CH<sub>4</sub> production in the picoplankton fraction during both  
18 upwelling (austral spring-summer) and non-upwelling (winter) seasons, being particularly relevant in the later period when  
19 *Synechococcus* contributed with high relative abundance. Long-term microcosm experiments underscore the importance of  
20 heterotrophic bacteria and cyanobacteria in methylotrophic methanogenesis, enhancing CH<sub>4</sub> regeneration, mediated by  
21 dissolved organic matter (DOM) recycling. In conclusion, picoplankton emerges as a key factor in both production and  
22 **metabolization** of methylated substrates, being responsible for maintaining CH<sub>4</sub> supersaturation. These findings provide  
23 valuable insights into the biogeochemical processes driving CH<sub>4</sub> dynamics in highly productive upwelling waters.

24 **Key words:** dissolved methane, oxic methane production, surface layer, picoplankton, coastal upwelling.

25

## 26 **Key points:**

27 1. Picoplankton (<3 μm) are identified as key players in CH<sub>4</sub> production in the ocean surface layer, in light and dark conditions,  
28 while larger organisms (<150 μm) do not significantly contribute to this process.

29 2. Methylated substrates, such as methylphosphonic acid (MPn) and trimethylamine (TMA), stimulate CH<sub>4</sub> production in the  
30 picoplankton fraction.

31 3. *Synechococcus* and MPn substrate could be important components for CH<sub>4</sub> generation during the non-upwelling season,  
32 while picoeucaryotes and TMA substrate are important during the onset of upwelling for CH<sub>4</sub> generation.

33 4. Picoplankton's role in methylotrophic methanogenesis is crucial in maintaining CH<sub>4</sub> supersaturation in the surface layer and  
34 contributing in part to CH<sub>4</sub> exchange with the atmosphere.

35

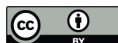

## 36 1 Introduction

37 Methane (CH<sub>4</sub>) is the most abundant organic molecule on Earth and acts as a potent greenhouse gas, with a radiative power  
38 thirty times greater than CO<sub>2</sub> over 100 years, positively affecting the global heat balance (IPCC, 2021). Its short lifetime, about  
39 10 years, makes it possible to take actions to mitigate climate change (Harmsen et al., 2020). In the ocean, physical and  
40 biogeochemical processes modulate CH<sub>4</sub> distribution in a complex manner, especially in the surface layer (Weber et al., 2019).  
41 Biogeochemically, CH<sub>4</sub> regeneration is governed by methanogenesis; conducted by methanogenic archaea in sediments and  
42 oxygen-deficient zones (Reeburgh, 2007), whereas methanotrophy, performed by methanotroph bacteria, consuming CH<sub>4</sub>,  
43 slows its exchange with the atmosphere (Bates et al., 1996; Saunio et al., 2020).

44 Paradoxically, non-methanogenic processes produce CH<sub>4</sub> in oxygenated surface environments (Liu et al., 2022; Karl et al.,  
45 2008). These processes could be important sources of biogenic CH<sub>4</sub>, maintaining well observed CH<sub>4</sub> supersaturations in the  
46 ocean surface (Lamontagne et al., 1973; Karl et al., 2008; Repeta et al., 2016), but not-well documented in global balances  
47 (Saunio et al., 2020). In the last decade, phytoplankton has been identified as an important nexus in CH<sub>4</sub> production in different  
48 marine ecosystems, linked to pathways such as demethylation via methylated compounds, which serve as substrates for aerobic  
49 CH<sub>4</sub> regeneration (Damm et al., 2010; Florez-Leiva et al., 2013; Lenhart et al., 2016; Karl et al., 2008; Sun et al., 2011).

50 Some of these compounds are produced/synthesized or exudated/degraded by diverse microbes such as *Nitrosopumilus*  
51 *maritimus*, which produces phosphonates like methylphosphonic acid (MPn) (Metcalf et al., 2012); while different  
52 phytoplanktonic size fractions contribute to sulphur derivatives like methionine (Lenhart et al., 2016),  
53 dimethylsulfoniopropionate (DMSP), and dimethyl sulfide (DMS) (Belviso et al., 1990; Stefels and Van Boekel,  
54 1993) as well as trimethylamines (TMA) (Sun et al., 2019). These substrates serve as potential carbon sources for  
55 microorganisms generating CH<sub>4</sub>, a process denominated methylotrophic methanogenesis.

56 Picoplankton (< 0.2 μm), the smallest plankton size excluding viruses, are abundant in the ocean surface (Johnson and  
57 Sieburth, 1979) and key to dissolved organic carbon (DOM) recycling (Pomeroy et al., 2007). The coupling between  
58 autotrophic (e.g., *Prochlorococcus sp.*, *Synechococcus sp.*) and heterotrophic picoplankton (e.g., Pelagibacter, SAR 11) could  
59 lead to CH<sub>4</sub> production from various C-1 compounds (Carpenter et al., 2012; Repeta et al., 2016; Sun et al., 2019). Furthermore,  
60 Cyanobacteria serve as a CH<sub>4</sub> source through H<sub>2</sub> production during N<sub>2</sub> fixation (Berg et al., 2014).

61 The concentration and composition (quality) of DOC play a crucial role in marine CH<sub>4</sub> biogeochemistry, as DOC is released,  
62 consumed, and transformed (Azam and Malfatti, 2007). Specifically, heterotrophic prokaryotes degrade up to 50% of the  
63 carbon fixed by primary producers (Azam et al., 1983), reintroducing it into higher trophic levels through the microbial loop  
64 (Azam et al., 1983; Pomeroy et al., 2007). Additionally, they remineralize nutrients and generate greenhouse gases, such as  
65 CH<sub>4</sub> (Dinasquet et al., 2018; Sun et al., 2011). This highlights the intricate pathways involved in the biological origin of CH<sub>4</sub>.  
66 Several studies have indicated empirical correlations between pico- and microplankton (haptophytes, cryptophytes, and  
67 diatoms) biomass and CH<sub>4</sub> supersaturation (Bizic, 2021; Klintzsch et al., 2020; Lamontagne et al., 1973), suggesting a not



68 well-known mechanism linking photosynthesis with a methylated precursor (Bižić et al., 2020; Hartmann et al., 2020; Lenhart  
69 et al., 2016; León-Palmero et al., 2020); however, since picoplankton are small in size and biomass, it is difficult to observe  
70 this relationship. Understanding the interaction between plankton fractions and organic substrates is essential for  
71 comprehending the biogeochemical dynamics of CH<sub>4</sub> in the upwelling waters of central Chile, and has broader implications  
72 for marine ecosystems in general.

## 73 2 Material and methods

### 74 2.1 Water collection

75 Seawater was collected from the upwelling zone of central Chile (36° 0.802' S 73° 07.750' W) at the University of Concepcion  
76 (Chile) time series station, ST18. Monthly samplings have been conducted aboard the RV Kay Kay II since 2002. Continuous  
77 sampling with a CTD-O (SBE-19) instrument was performed to obtain temperature, salinity, and dissolved oxygen (DO)  
78 profiles, whereas seawater samples using 10 L Niskin bottles at various depths (0, 5, 10, 20, 30, 50, 65, 80 m) were obtained  
79 in triplicate for dissolved gas (oxygen and methane), nutrient and chlorophyll-a (Chl-a) analysis. Detailed methodologies can  
80 be found in Farías et al. (2021). From March 2019 to June 2020, Dissolved Organic Carbon (DOC) samples were specifically  
81 procured from depths of 5, 20, 50 and 80 m.

82 Furthermore, to investigate the role of different sized planktonic communities in CH<sub>4</sub> cycling, seawater was gathered at a depth  
83 of 10 m, commonly associated with the Chl-a peak, as observed in studies such as Testa et al. (2018). These samples were  
84 earmarked for experiments with size-fractionated planktonic communities. Large zooplankton (150 µm mesh sieve) were  
85 excluded using the methodologies outlined by Sieburth et al. (1978), and the experiment included enrichment with organic  
86 substrates like MPn and TMA. The experimental setup is outlined in Table 1 and includes two variations of negative controls:  
87 1) sterile filtration using a 0.2 µm filter, a widely employed technique for microorganism removal (Hahn, 2004), and 2) HgCl<sub>2</sub>  
88 addition, ensuring complete biological inactivation. The positive control was considered to be the natural community (NC),  
89 with the entire community present naturally. To maintain the integrity of the samples, the seawater was transported in light-  
90 restricted black drums under controlled temperature conditions to the Marine Station Biology laboratory at Dichato (Fig. 1),  
91 minimizing the potential for biological activity. This is a time series study, from 2018 until 2021, encompassing CH<sub>4</sub> cycling  
92 experiments in different productivity phases.

93  
94 **Table 1. Summary of the experimental setup of short-term (GC vials) and long-term (microcosms) experiments with different**  
95 **treatments: NC: seawater with the natural plankton (control); <3 µm: picoplankton; <0.2 µm: femtoplankton (control +); <0.2 µm**  
96 **+ HgCl<sub>2</sub>: femtoplankton with HgCl<sub>2</sub> (control +) and CC: picoplankton concentrate; and the addition of methylated substrates (MPN:**  
97 **methyl phosphonic acid and TMA: trimethylamines). Different phases of the productivity period are: PI: Phase I; PII: Phase II;**  
98 **and PIII: Phase III.**



| Date           | Type of experiment | Setup                  | Plankton size ( $\mu\text{m}$ ) | Place     | Time (h) | Productivity period |
|----------------|--------------------|------------------------|---------------------------------|-----------|----------|---------------------|
| December 2018  | GC vials           | Plankton fractionation | CN, <3 and <0.2                 | Incubator | 24       | High (PI)           |
| January 2019   | GC vials           | Plankton fractionation | CN, <3 and <0.2                 | Incubator | 24       | High (PI)           |
| March 2019     | GC vials           | Add: MPn               | <3                              | Incubator | 24       | Intermediate (PII)  |
| May 2019       | GC vials           | Add: MPn and TMA       | <3                              | Incubator | 24       | Basal (PIII)        |
| April 2019     | Microcosms         | Add: MPn and TMA       | CN, <3, and CC                  | Cold room | 60       | Intermediate (PII)  |
| September 2019 | Microcosms         | Add: MPn and TMA       | CN, <3, and CC                  | Cold room | 60       | High (PI)           |

99

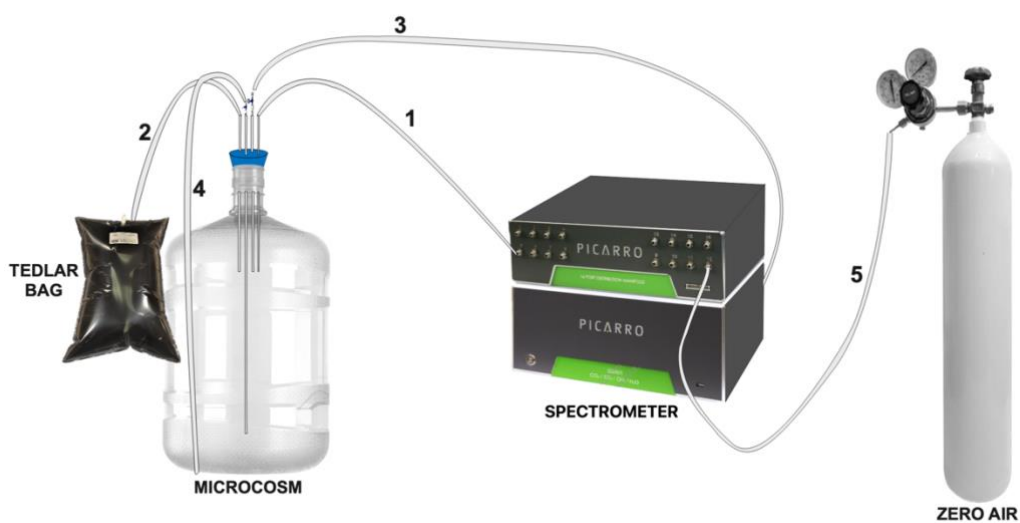

100  
 101  
 102  
 103

**Figure 1.** Assembly of the microcosm for long-term experiments (10 L). Capillary 1 is connected directly to the spectrometer. Capillary 2 is connected to a TEDLAR bag filled with N<sub>2</sub> (3L). Capillary 3 is removable and connected to the outlet of the spectrometer. Capillary 4 is connected to a loose hose for water sampling and hose 5 is connected to zero air.



104

105 **2.2 Short-term experiments of CH<sub>4</sub> cycling by size-fractionated planktonic communities enriched with organic**  
106 **substrates.**

107 The fractionation of planktonic communities based on size was conducted through a careful sequential filtration process, where  
108 5 L of seawater was gently passed through a pre-filter of 150 µm nylon, followed by 3 µm Isopore, and 0.22 µm Millipore  
109 membranes, yielding two fractions: picoplankton (<3 µm), and **femtoplankton (<0.2 µm)** communities. NC was obtained  
110 directly without filtering, as is detailed in Table 1.

111 Prior to incubation, initial seawater sampling was taken for each treatment group, wherein triplicate measurements were taken  
112 of oxygen (125 mL), COD (60 mL), Chl-a (100 mL), and nutrients (15 mL). Subsequently, each size-fractionated sample was  
113 homogenized and swiftly transferred into 20 mL vials (108 in total, twenty-seven per treatment). These vials were immediately  
114 sealed using rubber and aluminium caps to prevent any potential atmospheric gas contamination. The incubation of these  
115 sample vials took place within an FOC 225E incubator, maintained at a temperature of 13 °C, and under a 12-hour photoperiod  
116 (24 hours). The illumination was calibrated to fall in a range of 11-11.5 µmol m<sup>-2</sup> s<sup>-1</sup> using blue and neutral density blank  
117 filters. At intervals of four hours, three vials from each treatment (Table 1) were withdrawn, and immediately poisoned with  
118 50 µL of HgCl<sub>2</sub> and then, the vials were gently agitated to ensure homogenization. Gas chromatography was employed to  
119 analyze the CH<sub>4</sub> content of the vials.

120 In another set of experiments (Table 1), the picoplankton fraction was singled out to ascertain its capacity for metabolizing  
121 methylated substrates and subsequently cycling CH<sub>4</sub>. This involved adding MPn and TMA to the samples. The final  
122 concentration of both substrates in these treatments was maintained at 1 µM, assuming that natural concentrations in the  
123 seawater were at trace levels. Thus, these could be considered as potential experiments (highly enriched). The experimental  
124 conditions remained consistent with those employed in the earlier experiment.

125 **2.3 Long-term experiments of CH<sub>4</sub> cycling by size-fractionated planktonic communities enriched with organic**  
126 **substrates.**

127 Nine microcosms were developed using a system of gas-tight polycarbonate bottles (13 L). Each microcosm contained 10L of  
128 seawater for treatment and 3L of headspace. They were equipped with a closed gas circuit and connected to a gas spectrometer  
129 analyzer capable of simultaneously and continuously measuring various gases, including CO<sub>2</sub>, CH<sub>4</sub>, N<sub>2</sub>O, and humidity  
130 percentage. Each bottle featured a rubber cap equipped with four holes (as depicted in Fig. 1), housing a 5mm glass capillary  
131 within each hole. These capillaries were connected to gas-tight Teflon hoses. Specifically, the first capillary extended to the  
132 middle of the headspace (1) and was linked to an accessory (16-Port Distribution Manifold A0311) of the Picarro G-2308  
133 spectrometer for Cavity Ring Spectroscopy System (CRDS), designed for the measurement of gases in equilibrium with the  
134 aqueous phase. The second capillary was suspended within the headspace (2) and connected to a Tedlar bag (3 L) filled with  
135 N<sub>2</sub>. This arrangement aimed to prevent imbalance when drawing water samples from the microcosm. The third capillary, also



136 suspended in the headspace (3), was equipped with a 3-way cannula, and was connected to the air outlet of the Picarro G-2308  
137 spectrometer, to facilitate the recirculation of air within the headspace. This system optimization aimed to mitigate excessive  
138 headspace during spectrometer air sampling, preventing a gas-seawater phase imbalance. This hose (3) was adjustable and  
139 replaced upon measuring gas concentrations in each microcosm. The fourth glass capillary was submerged in the seawater, 3  
140 cm from the bottom (4). It was attached to a 3-way cannula, streamlining the sample extraction process.

141 In both April and September of 2019, a series of long-term microcosm experiments were conducted. These months were  
142 strategically chosen: the first coinciding with the transition of phytoplankton composition to nano-picoplankton (the basal  
143 productivity period), and the second with diatom blooms (larger phytoplankton dominance) (high productivity period), as  
144 highlighted in studies by Anabalón et al. (2007), Cuevas et al. (2004), and González et al. (2007). The experiment encompassed  
145 three distinct treatments, 1) Control without any methylated substrates added to natural communities (NC), picoplankton  
146 community ( $< 3 \mu\text{m}$ ) and concentrated picoplanktonic community (CC) 2) all treatments enriched with MPn 3) and all  
147 treatments enriched with TMA (see Table 1).

148 The concentrated fraction of picoplankton (CC) was procured through tangential flow filtration via a  $0.2 \mu\text{m}$  filter, following  
149 a procedure developed by Giovannoni et al. (1990) for harvesting greater quantities of microbial biomass and using pre-  
150 filtering steps as discussed earlier to concentrate only picoplankton ( $< 3 \mu\text{m}$ ). To discern whether the tangential flow filtering  
151 was effective, the abundance of cyanobacteria, picoeukaryotes and heterotrophic bacteria was measured with flow cytometry.  
152 The incubations were carried out within a controlled cold room environment, maintaining a temperature range of 12 to  $13 \text{ }^\circ\text{C}$ ,  
153 with same illumination used in short periods over 60 hours. In the initial stages, each bottle was sealed and allowed to acclimate  
154 for six hours in darkness. Following this stage, 1 mL of MPn (10 mM stock solution) and TMA (10 mM stock solution) were  
155 introduced to each bottle, yielding a final concentration of  $1 \mu\text{M}$ , matching the conditions established in prior experiments.

156 To prevent  $\text{CH}_4$  residue contamination, a purge with Zero air was performed (as shown in Fig. 1, line 5), ensuring accurate  
157  $\text{CH}_4$  concentration measurement within each microcosm, and establishing a baseline. Every four hours a cycle of  $\text{CH}_4$   
158 measurements was conducted continuously over 3 minutes, followed by a 6-minute hose cleaning (used for recirculation) with  
159 Zero air before connecting to capillary 3 for subsequent measurement. It is important to note that the equipment absorbed 240  
160 mL of air per minute of reading. Therefore, air recirculation within the microcosm, as previously mentioned, was essential.  
161 Preceding the actual experiment, the concentrations of gases measured by the spectrometer were closely monitored for 30  
162 minutes, confirming that the recirculation process did not impact the measured gas concentrations.

## 163 2.4 Analytical analysis

164 Once the  $\text{CH}_4$  samples were taken, they were stored upside down, at room temperature and protected from light, and then  
165 analyzed in the GC.  $\text{CH}_4$  (discrete samples) was determined using the phase equilibrium method (McAuliffe, 1963). In this  
166 procedure, each vial was carefully treated, with the addition of 5 mL of inert gas (helium), creating a headspace to facilitate  
167 equilibrium between the aqueous and gas phases. Subsequently, the gas phase was measured in a gas chromatography  
168 Shimadzu 17 equipped with a flame ionization detector (FID). A Restek RT QS-Bond column (30 m length, 0.53 mm inner





169 diameter, 20  $\mu\text{m}$  film thickness) was employed, maintained at a temperature of 30  $^{\circ}\text{C}$  with a flow of 2.6  $\text{ml min}^{-1}$ , using He as  
170 an ultrapure gas carrier.

171 Five-point calibration curves (linear response of the detector) were made for each monthly sample set (treatment), using a gas  
172 with a composition and concentration equivalent to that of the current atmosphere from NOAA ( $1863.4 \pm 0.3$  ppbv for  $\text{CH}_4$ )  
173 (Bullister et al., 2016) as the primary standard, as well as three standard gas mixtures (Air Liquide, USA) and zero air (synthetic  
174 air without  $\text{CH}_4$  tracers). In each  $\text{CH}_4$  sample set (every treatment), standards were added at the beginning, middle and end of  
175 the measurements to corroborate the correct functioning of the detector.  $\text{CH}_4$  measurements (triplicate) with a variation  
176 coefficient greater than 10% were not considered.

177 To assess DO content, 125 mL glass flasks were used for sample collection in triplicate. These samples were immediately  
178 fixed and analyzed within 6 hours of collection through the Winkler method (Carpenter, 1965). The analysis was conducted  
179 using a Dosimat 665 instrument featuring an automatic photometric endpoint detector. The detection limit for this method  
180 stood at 2  $\mu\text{mol L}^{-1}$ . Nutrient samples were collected in triplicate using a 60 mL syringe and filtered through a 0.45  $\mu\text{m}$  cellulose  
181 acetate filter. The filtered content was held in 15 mL Falcon polyethylene bottles and stored at  $-20^{\circ}\text{C}$ . Analysis of these nutrient  
182 samples followed standard colorimetric techniques (Grasshoff et al. 1983) and was conducted using a SealAA3 segmented  
183 flow auto-analyzer. This analyzer featured four distinct channels, each equipped with specific modules tailored for individual  
184 nutrients.

185 To quantify Chl-a content, triplicate samples of 100 mL seawater were filtered using a GF/F filter and immediately stored at -  
186  $20^{\circ}\text{C}$ . Analysis was performed according to the method outlined by Holm-Hansen et al. (1965). A Turner Designs 10AU  
187 fluorometer was employed for measurement, and a standard pigment served as a reference (Sigma-Aldrich C6144-1MG). For  
188 DOC assessment, samples were collected in triplicate using polyethylene bottles. Each 60 mL seawater sample was filtered  
189 through a GF/F filter that had been pre-treated by heating at 450  $^{\circ}\text{C}$  for 4 hours. After filtration, the samples were acidified to  
190 achieve a pH range of 2-3 and stored at  $-20^{\circ}\text{C}$ . These samples were analyzed via the infrared combustion method using a  
191 Shimadzu Organic Carbon Analyzer (TOC-LCPH).

192 For picoplankton abundance, 3mL of water was fixed with a glutaraldehyde solution (1%) and promptly frozen ( $-80^{\circ}\text{C}$ ) in  
193 liquid nitrogen for storage. Samples were analyzed with flow cytometry using an INFLUX, Cytopeia, equipped with five lasers  
194 (355-457-488-532-638 nm). Sort gates were optimized based on the autofluorescence of each group. *Synechococcus sp.* were  
195 identified based on their orange fluorescence (530/40 nm) using 488 nm blue and 532 nm green lasers, picoeukaryotes were  
196 identified by their red fluorescence (692/40 nm) using 488 nm blue laser, and bacterioplankton were detected using a  
197 combination of side scatter light (SSC) (related to cell size) versus green fluorescence (530/40 nm).

## 198 2.5 Data analysis

199 Dissolved  $\text{CH}_4$  concentration was calculated using the solubility coefficient from Wiesenburg & Guinasso (1979). The  
200 water column was divided into two layers according to density gradients: (1) surface layer (0 - 20 m) well mixed and (2)



201 subsurface layer (20 – 90m) from the base of the mixed layer to the bottom, around ~ 90 m (Farías et al., 2015), this was to  
202 interpret the vertical and temporal variability of CH<sub>4</sub> variation.

203 Inventories of CH<sub>4</sub>, Chl-a, nutrients, and nutrient ratios at the surface and subsurface layers were calculated through the  
204 trapezoidal integration of concentrations of each variable at each layer, using a minimum of three depths per layer. The averages  
205 were taken for DOC, because there were only two measurements taken per layer. The net CH<sub>4</sub> recycling rate (CH<sub>4</sub> accumulation  
206 minus CH<sub>4</sub> consumption) in different fractions of the phytoplankton community was calculated through a linear regression of  
207 CH<sub>4</sub> concentrations (Farías et al., 2009) during the incubation time (24 hours), separating the light cycles (12 hours of light  
208 and 12 hours of darkness).

209 CH<sub>4</sub> saturation was calculated following Eq. (1):

$$210 \text{ Sat}(\%) = \frac{[CH_4]_{in\ situ}}{[CH_4]_{eq}} \quad (1)$$

211 Where [CH<sub>4</sub>]<sub>eq</sub> was calculated using the solubility coefficient from Wiesenburg & Guinasso (1979).

212 Monthly anomalies of CH<sub>4</sub>, were estimated only in the surface layer, using the following Eq. (2)

$$213 \text{ Anomaly} = \frac{xCH_4 - \bar{x}CH_4}{\sigma_{CH_4}} \quad (2)$$

214 Where: xCH<sub>4</sub> is the discrete value at a certain depth (surface) and time (month), and  $\bar{x}CH_4$  is the median value for the whole  
215 (2018-2021) period at surface and  $\sigma_{CH_4}$  is the standard deviation of this dataset.

216 CH<sub>4</sub> hot moments were defined as a  $\Delta CH_4$  three times higher than the average monthly disequilibrium anomaly ( $\bar{x} \Delta CH_4$ ) at  
217 each depth within the surface layer as Eq. (3).

$$218 \frac{\Delta CH_4}{\bar{x} \Delta CH_4} > 3 \quad (3)$$

219 Where:  $\Delta CH_4$  is the disequilibrium of the gas at each depth and was estimated as Eq. (4):

$$220 \Delta CH_4 = [CH_4]_{in\ situ} - [CH_4]_{eq} \quad (4)$$

221 The daily CH<sub>4</sub> flux ( $F = \mu\text{mol m}^{-2} \text{d}^{-1}$ ) across the air-sea interface was determined using the equation from Broecker and  
222 Peng (1974), modified by Wanninkhof (1992) as follows Eq. (5):

$$223 F = K_w * (C_w - C^*) \quad (5)$$

224 Where:  $K_w$  ( $\text{cm h}^{-1}$ ) is the transfer velocity from the surface water to the atmosphere, as a function of wind speed, temperature,  
225 and salinity from the mixed layer depth (MLD), where wind speed were obtained from a meteorological station located at  
226 Carriel Sur (<http://www.meteochile.gob.cl/>) and MLD was calculated using a potential density-based criterion of Kara et al.  
227 (2003).  $C_w$  ( $\text{nmol L}^{-1}$ ) is the mean CH<sub>4</sub> concentration in the mixed layer and  $C^*$  is the gas concentration in the mixed layer  
228 expected to be in equilibrium with the atmosphere according to Wiesenburg & Guinasso (1979). Historical atmospheric  
229 values were obtained from registers of gas hemispheric and global monthly means from the NOAA/ESRL program at NOAA  
230 (<http://www.esrl.noaa.gov>). More details about the calculation of CH<sub>4</sub> fluxes are described in Farías et al. (2021).





## 231 2.6 Statistical analysis

232 To determine significant differences between the upwelling and non-upwelling periods in both surface and subsurface layers,  
233 the non-parametric Mann-Whitney U test was used. To analyze the degree of relationship between oceanographic variables  
234 and the variability of CH<sub>4</sub> in the surface layer, Spearman correlations were used. In addition, the Kruskal-Wallis non-  
235 parametric statistical test was used to define significant differences between the concentrations produced by the different  
236 treatments. The statistically significant value was considered to be  $p < 0.05$ .

## 237 3 Results and discussion

### 238 3.1 Oceanographic features of wind-driven coastal upwelling in central Chile

239 The continental shelf off central Chile experiences wind-driven coastal upwelling, seasonally controlled by the migration of  
240 the South Pacific anticyclone (Strub et al., 1998). This process leads to alongshore equatorward winds during the summer-  
241 spring period, producing coastal upwelling (Sobarzo and Djurfeldt, 2004; Sobarzo et al., 2007). The area is  
242 influenced by Equatorial Subsurface Water (ESSW), which is nutrient rich and has low dissolved O<sub>2</sub> levels (less than 44 μM).  
243 The ESSW is carried southward by the Chile-Peru Counter Current (Strub et al. 1998). This subsurface water mass is a source  
244 of nutrients for the surface layer during coastal upwelling, but also interacts with sediments, delivering low O<sub>2</sub> concentrations  
245 and high organic matter content to the bottom water and sediments. This creates an environment conducive to anaerobic  
246 organic matter mineralization, which supports denitrification, sulphate reduction and methanogenesis (Ferderlman et al., 1997;  
247 Farías et al., 2004).

248 Thus, advection of CH<sub>4</sub>-rich water from the subsurface and bottom layer, rather than in situ aerobic methanogenesis, has been  
249 described as the primary CH<sub>4</sub> source in the coastal upwelling regions. This mechanism has been observed in various eastern  
250 boundary upwelling systems, including California (Macías-Zamora, 2013; Sansone et al., 2001), Humboldt (Farías et al.,  
251 2021; Kelley and Jeffrey, 2002), Canary (Brown et al., 2014; Kock et al., 2008), and Benguela (Emeis et al., 2018;  
252 Monteiro et al., 2006; Morgan et al., 2019).

253 Our study reveals elevated CH<sub>4</sub> concentrations in the subsurface/bottom layer ranging from 0.43 to 78.72 nM (mean ± SD =  
254  $23.44 \pm 15.38$  nM, Fig. 2A), similar to the values found in long-term climatology (Farías et al., 2021). These elevated levels  
255 could be associated with the seasonal dynamics of organic matter mineralization under hypoxic to suboxic conditions during  
256 the favorable upwelling period (spring-summer); however, a similar subsurface/bottom CH<sub>4</sub> accumulation ( $p = 1.967$ ) during  
257 the upwelling ( $22.52 \pm 14.34$ ) and non-upwelling ( $24.60 \pm 16.65$ ) periods was found (Fig. 2A).  
258

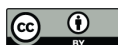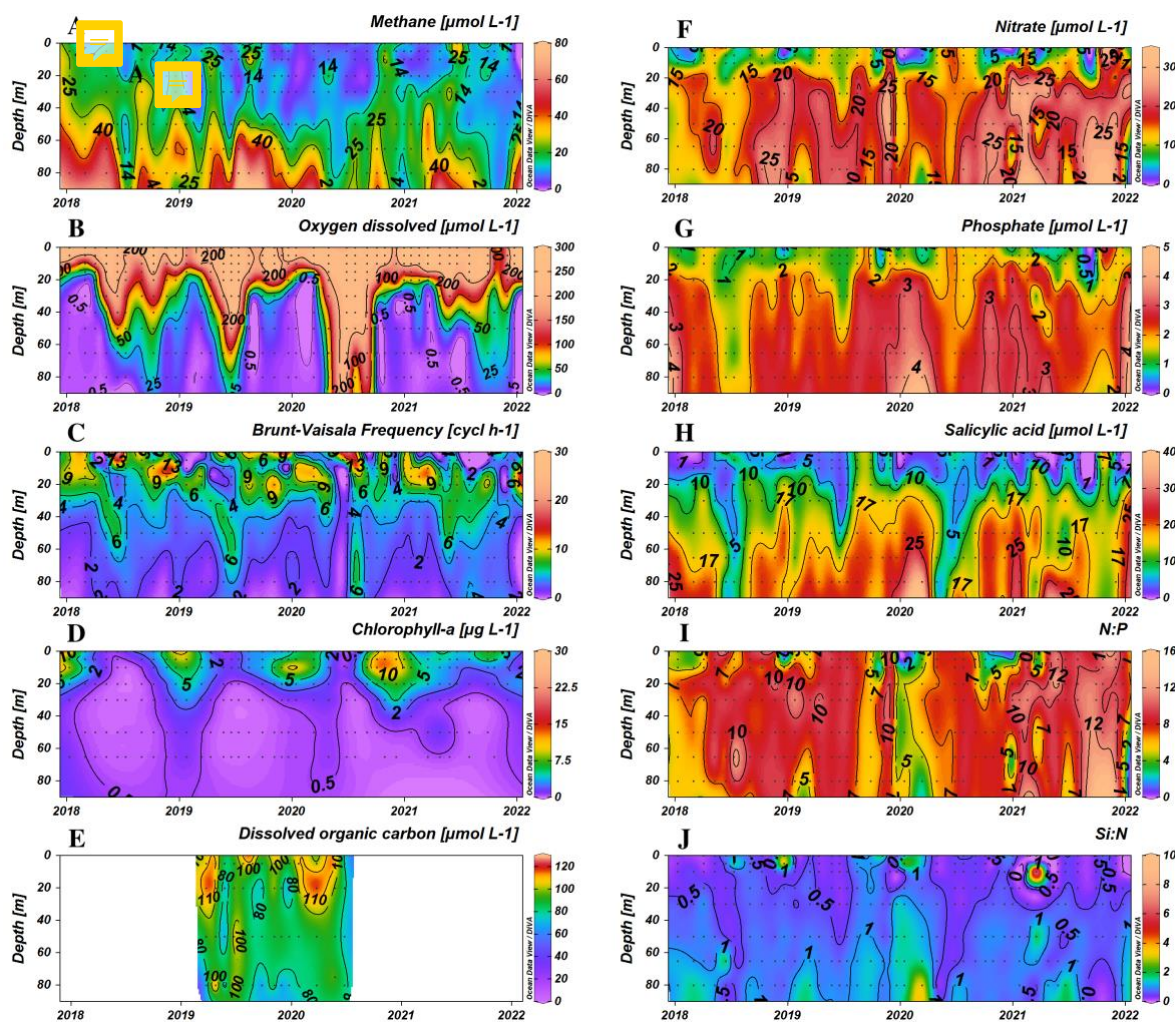

259

260

261

262

263

**Figure 2.** Time series of vertical distributions of A. Methane ( $\mu\text{mol L}^{-1}$ ), B. Dissolved oxygen ( $\mu\text{mol L}^{-1}$ ), C. Brunt-Vaisala Frequency ( $\text{cycl h}^{-1}$ ), D. Chlorophyll-a ( $\mu\text{g L}^{-1}$ ), E. Dissolved Organic Carbon (no Purgeable Organic Carbon -  $\mu\text{M}$ ) from 2019 to 2020, F. Nitrate ( $\mu\text{mol L}^{-1}$ ), G. Phosphate ( $\mu\text{mol L}^{-1}$ ), H. Salicylic acid ( $\mu\text{mol L}^{-1}$ ), N:P ratio and J. Si:N ratio. Sampling was made at ST18 from January 2018 to December 2021.

264

265

266

267

268

269

270

271

In the surface layer,  $\text{CH}_4$  concentration exhibits a heterogeneous distribution, ranging from 0.140 to 41.72 nM (mean  $\pm$  SD =  $11.70 \pm 7.79$  nM). Again, there are no differences in  $\text{CH}_4$  levels between non- and upwelling seasons ( $p = 1.654$ ). Indeed, within the mixed layer depth (20 m), during short periods (months), hot moments (local accumulations) of high  $\text{CH}_4$  levels ranging from 10.17 (390 % saturation) to 41.72 (1650 % saturation) are present indistinctly throughout the sampling period (Fig. S1). Furthermore, the hot moments consistently occur under oxygenated conditions ( $\text{O}_2 > 200 \mu\text{mol L}^{-1}$ ) (Fig. 2B) and eutrophic conditions (Fig. 2D). Sometimes they do not appear to be associated with vertical advection of  $\text{CH}_4$ -rich bottom waters and are present during both coastal upwelling and non-upwelling periods (Fig 2A and B).



272 This raises the question if they could be associated with local microbial processes on the surface or from the well-known  
273 vertical advection resulting from the upwelling process (Brown et al., 2014; Capelle and Tortell, 2016; Kock et al.,  
274 2008; Farías et al., 2021). Furthermore, the fact that no distinct seasonal difference in CH<sub>4</sub> concentration in surface water  
275 may also suggest a lateral advection from the Itata river that can discharge CH<sub>4</sub> (Bello, 2016), DOC (Vargas et al., 2016) and  
276 chromophoric DOM (CDOM) (Rain-Franco et al., 2019), which would also stimulate CH<sub>4</sub> regeneration via photooxidation  
277 (Li et al., 2020; Zhang and Xie, 2015).

278 Therefore, we assume that a portion of CH<sub>4</sub> exchanged with the atmosphere, ranged from 3.35 to 23.42 μmol m<sup>-2</sup> d<sup>-1</sup> (mean ±  
279 SD = 10.10 ± 5.77 μmol m<sup>-2</sup> d<sup>-1</sup>), originates from the surface layer, based on recent reports on *in situ* aerobic methanogenesis  
280 linked to the growth and metabolisms of microalgae (Cerbin et al., 2022; Günthel et al., 2020; Hartmann et al.,  
281 2020; Lenhart et al., 2016; Del Valle and Karl, 2014; Zhao et al., 2022; Klintzsch et al., 2019) and bacteria  
282 (Repeta et al., 2016; Metcalf et al., 2012; Sun et al., 2019). This production has been suggested to be an important source of  
283 CH<sub>4</sub> fluxes in various aquatic systems, such as stratified lakes (Bižić-Ionescu et al., 2018; Donis et al., 2017; Fazi et al., 2021;  
284 Grossart et al., 2011; Günthel et al., 2019, 2020; Tang et al., 2016; Wang et al., 2018) and in open oligotrophic oceans (Damm  
285 et al., 2010; Karl et al., 2008; Repeta et al., 2016; Sosa et al., 2020; Ye et al., 2020), and could be the case of our study area,  
286 particularly during the stratified period (winter) due to freshwater discharge.

287 It becomes apparent that *in situ* aerobic methanogenesis could play a significant role in driving CH<sub>4</sub> fluxes in coastal upwelling  
288 off central Chile. So far, we know that CH<sub>4</sub> is regenerated in the surface layer through DMS (Florez-Leiva et al., 2013), where  
289 several potential CH<sub>4</sub> sources might be active; but further research is needed to better understand the specific mechanisms and  
290 the relative contributions of different microorganisms to overall CH<sub>4</sub> production in this dynamic marine environment.

### 291 3.2 Biological productivity and other biogeochemical indicators

292 Considering that upwelling systems have high levels of primary production and concomitant high organic matter cycling; it is  
293 pertinent to investigate the extent to which the regenerated CH<sub>4</sub> is produced in the surface layer. Interestingly, while Chl-a  
294 levels peak (mean ± SD = 6.60 ± 5.98 μg L<sup>-1</sup>) in spring and early summer, basal levels of this pigment (mean ± SD = 0.09 ±  
295 7.33 μg L<sup>-1</sup>) remain high throughout the year (Morales and Anabalón, 2012; Testa et al., 2018). Curiously, the  
296 accumulation of surface CH<sub>4</sub> does not necessarily coincide with high Chl-a levels (Fig 2D).

297 Based on productivity, biomass, and a shift in the composition of phytoplankton (phytoplankton succession), along with other  
298 biophysical variables, the annual cycle of biological productivity has been separated into three distinct periods (Testa et al.,  
299 2018): September to January, with high productivity and Chl-a biomass dominated by microplankton such as large diatoms,  
300 tintinids, and dinoflagellates; February to April with intermediate productivity, characterized by a shift in plankton composition  
301 and biomass from larger to smaller organisms as flagellates; and May to August, with basal level productivity and relatively  
302 low Chl-a biomass. The latter (autumn-winter) is impacted by nutrient input from continental runoff and rivers with a

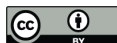

303 prevalence of picoplankton (e.g., *Synechococcus*) including small flagellates and ciliates. Therefore, factors such as  
 304 mixing/stratification (Fig. 2C) and a difference in nutrient contents and Si:N ratio (Fig. 2J) among phases (Table 2), due to  
 305 differential nutrient consumption or input from other sources, promote a shift in phytoplankton composition, from large  
 306 microorganisms during upwelling periods, to pico- and nanoplankton, such as small cyanobacteria (*Synechococcus*) and small  
 307 ciliates, during non-upwelling periods (Anabalón et al., 2007; Collado-Fabbri et al., 2011; (Jacob et al., 2018),(Jacob et al.,  
 308 2018). This cycle provides insight into the dynamics of primary productivity and CH<sub>4</sub> regeneration.

309

310 **Table 2. Average annual cycle of biochemical variables in each productivity period (mean ± SD) from 2018 to 2021, showing the**  
 311 **average chlorophyll (µg L<sup>-1</sup>) concentration in each period and inventories of methane (µmol m<sup>-2</sup>), chlorophyll-a (mg m<sup>-2</sup>), DOC (µmol**  
 312 **m<sup>-2</sup>), nitrate (µmol m<sup>-2</sup>), phosphate (µmol m<sup>-2</sup>), silicate (µmol m<sup>-2</sup>), N:P and Si:N ratios in both surface (SL) and subsurface (SSL)**  
 313 **layers. Number of hot moments in each period are counted.**

| Variable                      | Layer | Productivity periods       |                         |                              |
|-------------------------------|-------|----------------------------|-------------------------|------------------------------|
|                               |       | High                       | Intermediate – Phase II | Basal                        |
|                               |       | Phase I<br>(spring-summer) | (summer-autumn)         | Phase III<br>(autumn-winter) |
| Chl-a                         | SL    | 6.60 ± 5.98                | 3.23 ± 2.87             | 1.36 ± 1.91                  |
| CH <sub>4</sub>               | SL    | 265.59 ± 58.36             | 162.35 ± 21.44          | 240.54 ± 78.97               |
|                               | SSL   | 1315.07 ± 173.69           | 1012.86 ± 163.23        | 1275.17 ± 286.38             |
| Chl-a                         | SL    | 154.4 ± 102.31             | 51.32 ± 31.02           | 26.19 ± 21.17                |
| DOC                           | SL    | 114.44 ± 53.94             | 112.88 ± 8.36           | 92.41 ± 11.27                |
|                               | SSL   | 100.35 ± 46.51             | 96.97 ± 23.78           | 86.12 ± 8.95                 |
| NO <sub>3</sub> <sup>-</sup>  | SL    | 260.61 ± 96.25             | 208.67 ± 49.51          | 224.65 ± 13.44               |
|                               | SSL   | 1274.41 ± 344.24           | 1033.51 ± 38.5          | 987.6 ± 113.58               |
| PO <sub>4</sub> <sup>-3</sup> | SL    | 38.08 ± 10.35              | 30.29 ± 3.51            | 28.16 ± 2.99                 |
|                               | SSL   | 170.22 ± 34.07             | 137.05 ± 21.57          | 119.38 ± 11.73               |
| Si(OH) <sub>4</sub>           | SL    | 131.75 ± 47.07             | 91.65 ± 38.68           | 111.24 ± 37.9                |
|                               | SSL   | 1065.32 ± 206.98           | 811.2 ± 225.51          | 678.07 ± 168.68              |
| N:P                           | SL    | 7.69 ± 2.57                | 7.59 ± 2.44             | 8.48 ± 0.55                  |
|                               | SSL   | 9.28 ± 2.52                | 8.24 ± 0.92             | 8.46 ± 0.84                  |
| Si:N                          | SL    | 0.67 ± 0.1                 | 0.69 ± 0.73             | 0.49 ± 0.15                  |
|                               | SSL   | 1.04 ± 0.08                | 1.01 ± 0.26             | 0.74 ± 0.11                  |
| Hot moments                   | SL    | 19                         | 9                       | 15                           |

314





315 Table 2 presents Chl-a levels along with inventories of CH<sub>4</sub>, Chl-a, DOC, NO<sub>3</sub><sup>-</sup>, PO<sub>4</sub><sup>-3</sup>, S(OH)<sub>4</sub> and mean inorganic nutrient  
316 ratios (N:P and Si:N) in each period. In contrast to CH<sub>4</sub>, Chl-a exhibits a marked and expected seasonal cycle, with integrated  
317 levels decreasing from spring to winter (Table 2). Hence, there could be a wide range in the composition of the phytoplankton  
318 species involved in CH<sub>4</sub> cycling (Klitzsch et al., 2019; Günthel et al., 2020; Klitzsch et al., 2023). Recently, Klitzsch et al.  
319 (2023) identified the carbon isotope fingerprint of CH<sub>4</sub> released from six widespread marine phytoplankton species, three  
320 haptophyte algae and three cyanobacteria, incubated under laboratory conditions. They were clearly distinguished from CH<sub>4</sub>  
321 produced by methanogenic archaea, suggesting that algal and cyanobacterial populations may contribute substantially to CH<sub>4</sub>  
322 formation observed in the surface mixed layer of oceans and lakes.

323 Nutrient concentrations in the surface layer are subject to strong seasonal variability (Fig 2F, G and H) due to the advection of  
324 nutrient-rich upwelled water, as well as biological assimilation in surface waters. Therefore, NO<sub>3</sub><sup>-</sup> levels among upwelling and  
325 non-upwelling period are significantly different (p<0,05), and a similar trend is observed for PO<sub>4</sub><sup>-3</sup> and Si(OH)<sub>4</sub>. Remarkably,  
326 the inorganic N:P ratio, ranging from 0.15 to 15.01, are generally less than expected (Redfield stoichiometry). This is due to  
327 the influence of Oxygen Minimum Zone (OMZ) (associated with ESSW), which is laterally and vertically advected to the  
328 surface, indicating denitrified waters (Fernandez et al., 2015) and local denitrification (Silva et al, 2009; Farías et al., 2004).

329 Nutrients inventories show significant differences among the different productivity periods, with elevated levels in the  
330 subsurface layer (Table 2). However, at the surface, Si(OH)<sub>4</sub> and the Si:N ratio only slightly increase from basal to high  
331 productivity periods (Table 2), while the N:P ratio is higher in the basal productivity period. Moreover, during basal  
332 productivity period, the increase of Si(OH)<sub>4</sub> is likely due to the freshwater discharge during the winter. This indicates that at  
333 the beginning of upwelling (high productivity), when the water column begins to stratify (Fig. 2C) and there is a higher  
334 predominance of Si (Si:N ratio) coming from the advection of cold and nutrient -rich water, the growth of large diatoms is  
335 promoted (Morales and Anabalón, 2012; Anabalón et al., 2007), which, to a certain extent, results in the depletion  
336 of this nutrient (Table 2). Whereas during the non-upwelling period, when the water column begins to mix (Fig. 2C) and the  
337 nutrient regeneration rate change, the N:P ratio increases in basal productivity period, which leads to a predominance of  
338 nitrogen-fixing organisms (cyanobacteria) and small ciliates (Anabalón et al., 2007; Collado-Fabbri et al., 2011).

339 High DOC concentrations, typical of highly productive coastal zones (Igarza et al., 2019; Vargas et al., 2013) are found in the  
340 study area, ranging from 58.79 to 128.63µM (mean ± SD = 90.37 ± 17.05) and peaking at the surface during late summer and  
341 early fall, with low values in subsurface layers (Fig 2E). At the surface, mean DOC inventory decreases between Phase I and  
342 Phase III (Table 2), which suggests an increase in picoplanktonic abundance and activity in Phase III (Collado-Fabbri et al.,  
343 2011) that allows a high DOC accumulation (Fig 2E) (Herndl and Malacic, 1987). In this period, significant DOC  
344 accumulation could be ascribed to a DOC generation greater than its respective heterotrophic bacterial consumption (Hansell  
345 and Orellana, 2021), or it may consist of refractory DOC that is difficult to degrade (Bauer and Druffel, 1998).

346 On the other hand, several hot moments (Fig. S1) are identified in different phases of productivity and phytoplankton  
347 succession (Collado-Fabbri et al., 2011; Aldunate et al., 2018; Anabalón et al., 2007), even at different nutrients ratios and



348 DOC concentrations (Table 2), indicating that the factors favoring **their** occurrence are not entirely clear. Furthermore, we  
349 found no significant correlation among biochemical variables at the surface (Fig. S2), suggesting that the interactions between  
350 these variables are complex and not easily explained by simple linear relationships.

351 This complexity poses a challenge to understanding the dynamics of CH<sub>4</sub> in the studied system. To gain a deeper understanding  
352 of CH<sub>4</sub> dynamics, short-term and long-term CH<sub>4</sub> cycling experiments have been conducted, focusing on size-fractionated  
353 planktonic communities along with organic substrates. This approach makes it possible to explore and uncover the specific  
354 interactions and substrates that may favor CH<sub>4</sub> production. By focusing on the size fractions of planktonic communities, the  
355 contributions of diverse groups to CH<sub>4</sub> regeneration, such as phototrophic (primary producers like microalgae) and  
356 heterotrophic assemblage's communities, could be assessed.

### 357 **3.3 Short-term CH<sub>4</sub> cycling by size-fractionated planktonic communities.**

358 The time course of CH<sub>4</sub> accumulation/depletion in fractionated plankton experiments with daily incubations (12 hours of light  
359 and 12 hours of darkness) is shown in Fig. 3. The first experiments were conducted in December 2018 (Fig. 3A) and January  
360 2019 (Fig. 3B), corresponding to a period of high productivity or phase I (Table S1), and coinciding with strong vertical  
361 advection. Surface water exhibits cooling (~12 - 13 °C) and elevated CH<sub>4</sub> levels (9.44 – 17.09 nM), indicative of an active  
362 upwelling period (Farias et al., 2021), aligning with other indicators of coastal upwelling (Aguirre et al., 2021).

363



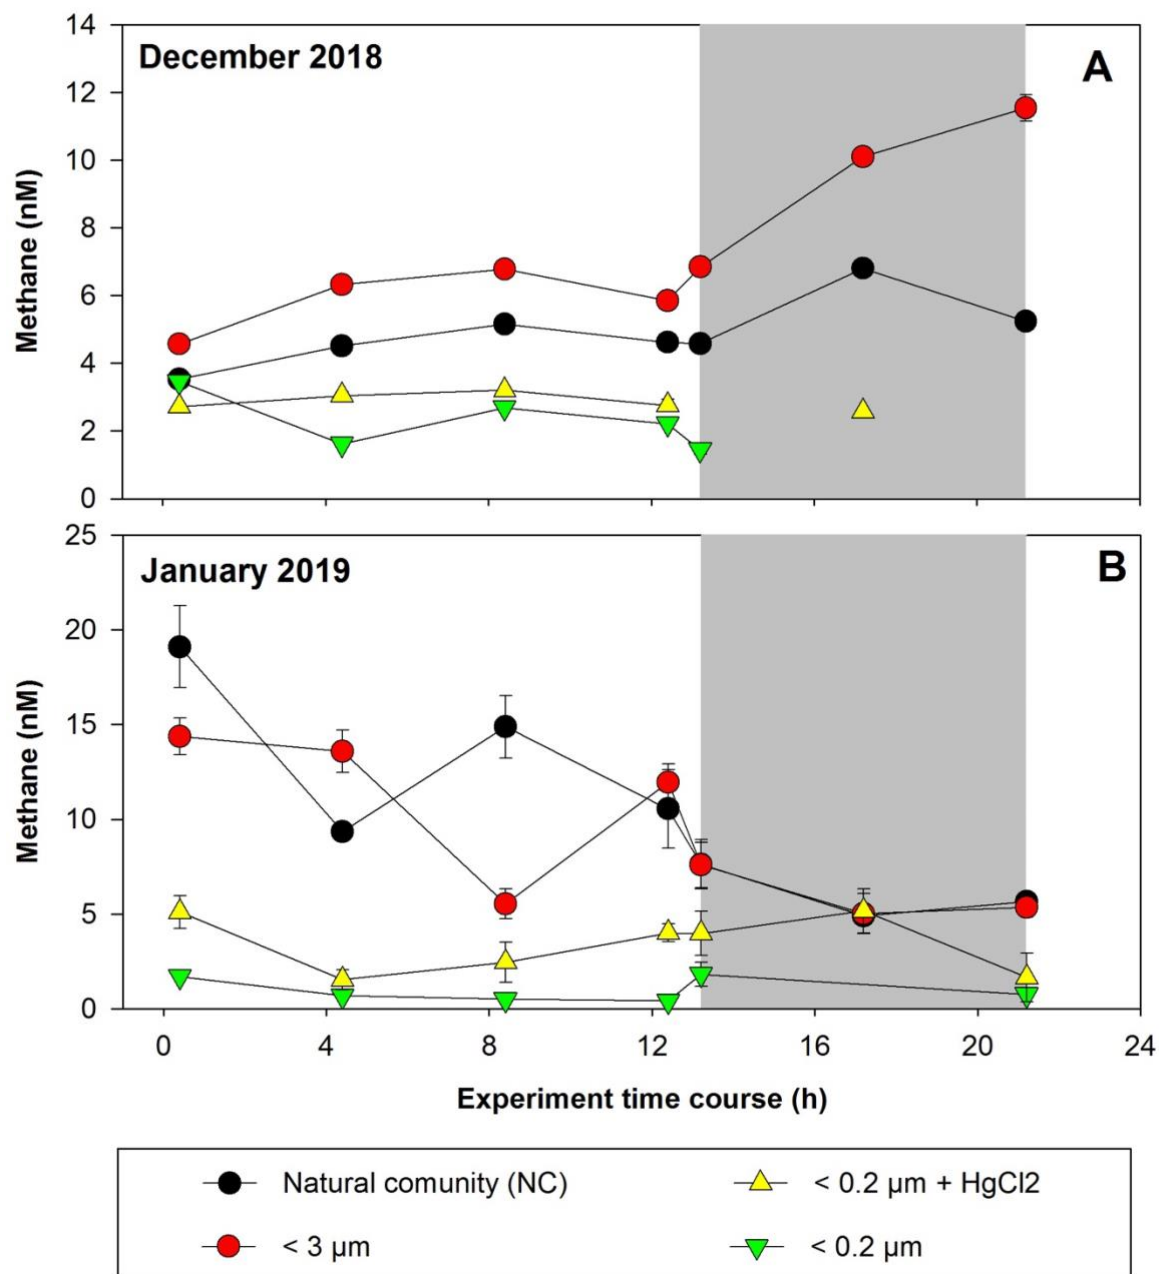

364  
 365 **Figure 3. Time courses of dissolved methane concentration (nM) during incubations with fractionated plankton experiments (NC:**  
 366 **natural community; <3 μm: bacterioplankton and <0,2 μm: femtoplankton. A. December 2018 and B. January 2019. Photoperiod is**  
 367 **represented in white (light) and gray (dark). Error bars represent standard deviation of triplicate samples, when error bars are not**  
 368 **visible, they are within the area of the symbol.**

369



370 In the treatments involving fractions  $<0.2 \mu\text{m}$  and  $<0.2 \mu\text{m} + \text{HgCl}_2$ , which serve as negative controls,  $\text{CH}_4$  concentration kept  
371 almost constant during incubation, with concentrations below 2.32 nM (Fig. 3A) and 5.51 nM (Fig. 3B). This proves that  $\text{CH}_4$   
372 production is entirely biological (Table S2). Although abiotic  $\text{CH}_4$  production via photooxidation of CDOM has been  
373 demonstrated under oxygenated conditions (Li et al., 2020; Zhang and Xie, 2015), our experiments indicated that  
374 abiotic processes, such as DOM photochemical reactions (Mopper et al., 2015), did not take place. However, this process may  
375 contribute to the DOM pool to be photo oxidized, producing  $\text{CH}_4$  at shallower depths ( $<10 \text{ m}$ ) (Li et al., 2020; Zhang &  
376 Xie, 2015).

377 In December,  $\text{CH}_4$  concentrations in the NC (positive control) and  $<3 \mu\text{m}$  fractions experienced slight increases under light  
378 conditions (Fig. 3A, Table S2). However, during darkness, the net  $\text{CH}_4$  accumulation was significantly higher in the  $<3 \mu\text{m}$   
379 fraction ( $p=0.03$ ; Table S2). Picoplankton includes autotrophic and heterotrophic unicellular organisms in the size range of 0.2  
380 to  $2 \mu\text{m}$ . The autotrophic organisms include cyanobacteria (*Prochlorococcus* and *Synechococcus*) and diverse picoeukaryotes  
381 larger than  $1 \mu\text{m}$  (Worden, 2006), while the heterotrophic are primarily prokaryotes, with bacteria overwhelmingly dominating  
382 over archaea in the upper layers (Smith et al., 2013). This fraction ( $<3 \mu\text{m}$ ) hosts several coexisting metabolic groups,  
383 dependent on or subsidized by different energy sources such as sunlight, DOM, or even a combination of the two  
384 (mixotrophy). All together they are critical for the functioning of the microbial food web mainly responsible for DOC cycling  
385 (Muñoz-Marín et al., 2020; Raven, 1998; Azam et al., 1983; Reintjes et al., 2020) and its derivative compounds (including  
386  $\text{CH}_4$ ).

387 In January, the incubations displayed a distinctly different behavior, with  $\text{CH}_4$  levels decreasing over incubation time in both  
388 the NC and  $<3 \mu\text{m}$  fractions for both photoperiods (Fig. 3B), although the rate of consumption was lower in the dark (Table  
389 S2). These differences suggest that the structure/composition of the microbial community during the high productivity period,  
390 as well as the quantity and quality of DOC and nutrient concentrations and their ratios (Allen et al., 2012; Sarmiento et al.,  
391 2013; Spilling et al., 2019; Sarmiento et al., 2013), may control  $\text{CH}_4$  recycling. Indeed, the environmental conditions during  
392 sampling differed (Table S1); although both months were oxygenated, both varied in Chl-a and nutrient levels, including  $\text{CH}_4$ .  
393 In 2018, December marked the beginning of the upwelling, with the oxycline moving upward at 20 m (Fig. 2B), while in  
394 January, the upwelling (vertical advection) was at its strongest (Fig. 2C; Table S1).

395 When the NC and even the  $<150 \mu\text{m}$  fraction treatments (data not shown) are compared with the  $<3 \mu\text{m}$  fraction, significant  
396 differences in  $\text{CH}_4$  recycling rates are found ( $p < 0.05$ ), especially in darkness (Table S2). The highest recycling rates occur in  
397 the  $<3 \mu\text{m}$  fraction, indicating that larger microorganisms do not affect the net  $\text{CH}_4$  accumulation/consumption (Table S2),  
398 and emphasizing the importance of the microbial loop (Azam et al., 1983) in  $\text{CH}_4$  recycling. Additionally, the observed  
399 differences between photoperiods in both fractions could suggest coupling mechanisms between autotrophic phytoplankton  
400 and heterotrophic bacterioplankton communities (León-Palmero et al., 2020; Morán et al., 2002; Repeta et al., 2016). Here,  
401 DOC accumulated in light conditions could be rapidly utilized by bacterioplankton in dark conditions (Hartmann et al., 2020;  
402 Thornton, 2014), leading to high  $\text{CH}_4$  concentrations.



403 CH<sub>4</sub> consumption by methanotrophs should be considered (Mao et al., 2022), since aerobic CH<sub>4</sub> oxidation can reduce the CH<sub>4</sub>  
404 accumulation rate (net production vs. consumption) by as much as half (Florez-Leiva et al., 2013). It is known that  
405 methanotrophs are inhibited in light conditions (Dumestre et al. 1999; Morana et al., 2020), thus CH<sub>4</sub> accumulation should be  
406 higher in this condition. However, this contrasts with our results (light/dark conditions), meaning that both methanotrophy and  
407 methylotrophy are very dynamic and complex, making it difficult to decipher in a daily cycle.

### 408 3.4 Short-term CH<sub>4</sub> cycling experiment from picoplankton amended with organic substrates.

409 The picoplankton showed the highest rate of CH<sub>4</sub> accumulation, prompting its selection to be assessed for its potential for  
410 methylotrophic methanogenesis through the addition of methylated substrates (MPn and TMA) in a daily cycle. Both MPn  
411 and TMA are dissolved methylated compounds known to stimulate CH<sub>4</sub> production because they have a methyl radical (-CH<sub>3</sub>),  
412 a potential precursor for CH<sub>4</sub> formation in oxygenated environments (Karl et al., 2008; Repeta et al., 2016).

413 These compounds are ubiquitous in various ecosystems (Lohrer et al., 2020; Sun et al., 2019), yet they have distinct metabolic  
414 origins. While MPn originates from *Arquea Nitrosopumilus maritimus* (Metcalf et al., 2012) and is found at very low  
415 concentrations (~0.01 μM, close to its analytical detection limit), likely due to rapid microbial turnover (Karl et al. 2008;  
416 Martínez et al. 2013; Urata et al. 2022), TMA exhibits a wide concentration range in the ocean, from nM levels in the open  
417 ocean to μM levels in sediments and near the coast (Sun et al., 2019). Environmental TMA concentrations could be higher,  
418 particularly in upwelling events that bring TMA from bottom waters to the surface (Gibb et al., 1999; Sun et al., 2019). In this  
419 context, the amendments performed for each substrate, 100-fold for MPn and 1000-fold for TMA, have potential for  
420 experimentation.

421 ~~It is important to note that amended experiments~~ were conducted in Phase II (March 2019) and phase III (May 2019), periods  
422 of change in phytoplankton succession (composition), biomass and abundance (Testa et al., 2018). In winter, the relative  
423 abundance of picoplankton with respect to microplankton (particularly the presence of *Synechococcus* and nitrifying archaea)  
424 increases significantly, especially photosynthetic picoeukaryotes (Collado-Fabbri et al., 2011).

425 The time course CH<sub>4</sub> accumulation during incubations is illustrated in Fig. 4. The highest CH<sub>4</sub> accumulation was observed in  
426 the MPn-amended treatment, particularly under dark conditions in May (Phase III) (Fig. 4B; Table S1). Interestingly, in both  
427 periods, the <3 μm + MPn treatment exhibited contrasting patterns under dark conditions (Fig. 4A and 4B), decreasing in  
428 Phase II and increasing in Phase III, suggesting the importance of microbial composition. During winter, a higher DOC  
429 concentration was observed (Fig 2E), which may lead to higher bacterial and archaeal activity that could be metabolizing  
430 DOC, including MPn under dark conditions.

431

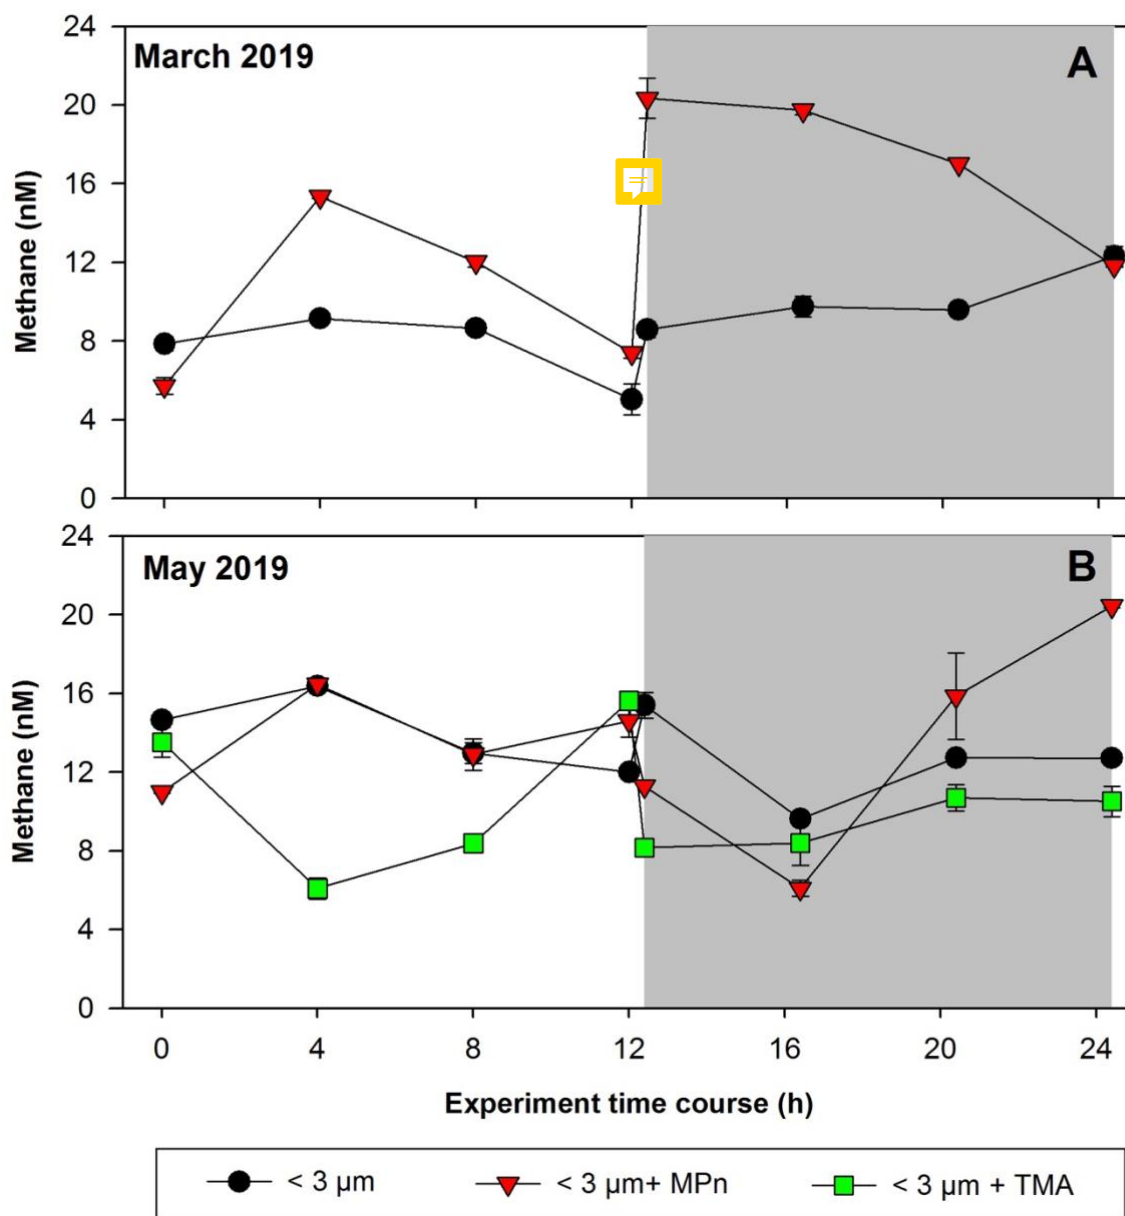

432  
433  
434  
435  
436  
437

Figure 4. Time courses of dissolved methane concentration (nM) during incubations with the addition of methylated substrates (MPn: methyl phosphonic acid and TMA: trimethylamine) performed with bacterioplankton (<3 μm) and bacterioplankton concentrate (CC). A. March 2019 and B. May 2019. Photoperiod is represented in white (light) and gray (dark). Error bars represent standard deviation of triplicate samples, when error bars are not visible, they are within the area of the symbol.



438 Conversely, the TMA treatment did not result in any CH<sub>4</sub> accumulation. In fact, CH<sub>4</sub> accumulation in this treatment was lower  
439 compared to the control and MPn treatments (Fig. 4B), contrary to expectations in a nitrogen-limited ecosystem. Indeed, in  
440 the study area inorganic nutrient N:P ratios are consistently below the Redfield ratio of 16 (Redfield et al., 1963), in both  
441 surface (mean ± SD: 7.354 ± 2.947) and subsurface (mean ± SD: 8.217 ± 3.443) layers. This N deficit is primarily influenced  
442 by the lateral and vertical advection of denitrified water from equatorial origin (ESSW) transported poleward by the Peru-  
443 Chile undercurrent (Fernandez et al., 2015; Fernandez & Farías, 2012; Silva et al., 2009), along with a local  
444 dissimilative NO<sub>3</sub><sup>-</sup> reduction during anaerobic organic matter mineralization (Farías et al., 2004) and possibly PO<sub>4</sub><sup>-3</sup> release  
445 from anoxic sediments (Holmkvist et al., 2010).  
446 While TMA can be metabolized by marine bacteria (Lidbury et al., 2015; Bižić-Ionescu et al., 2018), the lower CH<sub>4</sub> production  
447 in this treatment suggests a different outcome. In contrast, heterotrophic picoplankton might metabolize MPn and produce  
448 CH<sub>4</sub>, showing *in situ* methanogenesis via the carbon-phosphorus (C-P) lyase pathway (Karl et al., 2008). Although this  
449 pathway has primarily been described for PO<sub>4</sub><sup>-3</sup>-limited environments like gyres, the possibility of its occurrence in upwelling  
450 areas with PO<sub>4</sub><sup>-3</sup> excess cannot be dismissed, although the rates might be lower (Bižić-Ionescu et al., 2018).

### 451 3.5 Long-term CH<sub>4</sub> cycling from concentrated picoplankton amended with organic substrates.

452 Aiming for comprehensive insights, our study encompassed long-term microcosm experiments strategically performed during  
453 two (of three) distinct phases of productivity as was described (Testa et al., 2018). The intermediate productivity phase (Phase  
454 II or late summer - autumn time) was characterized by a notable relative prevalence of autotrophic cyanobacteria  
455 (*Synechococcus*). In contrast, the high productivity period (Phase I or early spring time) (Fig. S3A and D) was marked by a  
456 prevalence of diatoms (Fig. S3B and E), while heterotrophic bacterioplankton exhibited almost constant presence in both  
457 periods (Fig. S3C and F). These temporal distributions align with well documented patterns in our study area, where light,  
458 oxygen, temperature, and nutrient levels drove the seasonal and vertical segregation of specific cyanobacteria, picoeukaryotes  
459 and heterotrophic bacterioplankton, which represent the <3 μm fraction in this study (Aldunate et al., 2018; Collado-Fabbri et  
460 al., 2011; De La Iglesia et al., 2020; Molina et al., 2020).

461 Briefly, Flavobacteraceae, SAR11 subclade IA (*Candidatus Pelagibacter* ubique-associated), SAR11 subclade 1b,  
462 gammaproteobacterial clades, and SAR86 are prevalent during upwelling seasons, while during non-upwelling seasons or  
463 phase III, SAR11 subclade II, Marine Actinobacteria, and unclassified Alphaproteobacteria dominated (Aldunate et al., 2018).  
464 Additionally, photosynthetic picoplankton eukaryotes related to Mamiellophyceae (*Bathycoccus*, *Micromonas*, and  
465 *Ostreococcus*) were predominantly observed with high significance in the surface layer during the transition period (Collado-  
466 Fabbri et al., 2011; De La Iglesia et al., 2020), whereas heterotrophic bacteria abundance ranging from 0.23 to 6.50 x10<sup>6</sup> cell  
467 mL<sup>-1</sup> were mainly concentrated in the surface during late summer and autumn, with minima in winter (Molina et al., 2020).  
468 However, in our study, heterotrophic bacteria abundance showed no significant differences (p = 0.05) in both periods (1 x 10<sup>6</sup>  
469 cells/mL) (Fig. S3C and F). This is due to the low DOC at the beginning of the upwelling period (Fig. 2E).

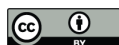

470 Phase II CH<sub>4</sub> accumulation during time incubations under different treatments is shown in Fig. 5. Concentration of cell  
471 abundance treatment or concentrated community (CC) resulted in substantial enrichments of cyanobacteria (*Synechococcus*),  
472 picoeukaryotes and heterotrophic bacteria, by factors of 1.9, 1.8 and 4.6, respectively, compared to the NC, and factors of 1.8,  
473 1.8 and 6.1 with respect to the <3 μm fraction (Fig. S4A, B and C). In both cases, a substantial increase in bacteria is noted  
474 (Fig. S4A, B and C). The microbial abundance proportions in NC at the beginning of the experiment were close to natural  
475 observations (Collado-Fabbri et al., 2011; Anabalón et al., 2007; Morales et al., 2007).  
476

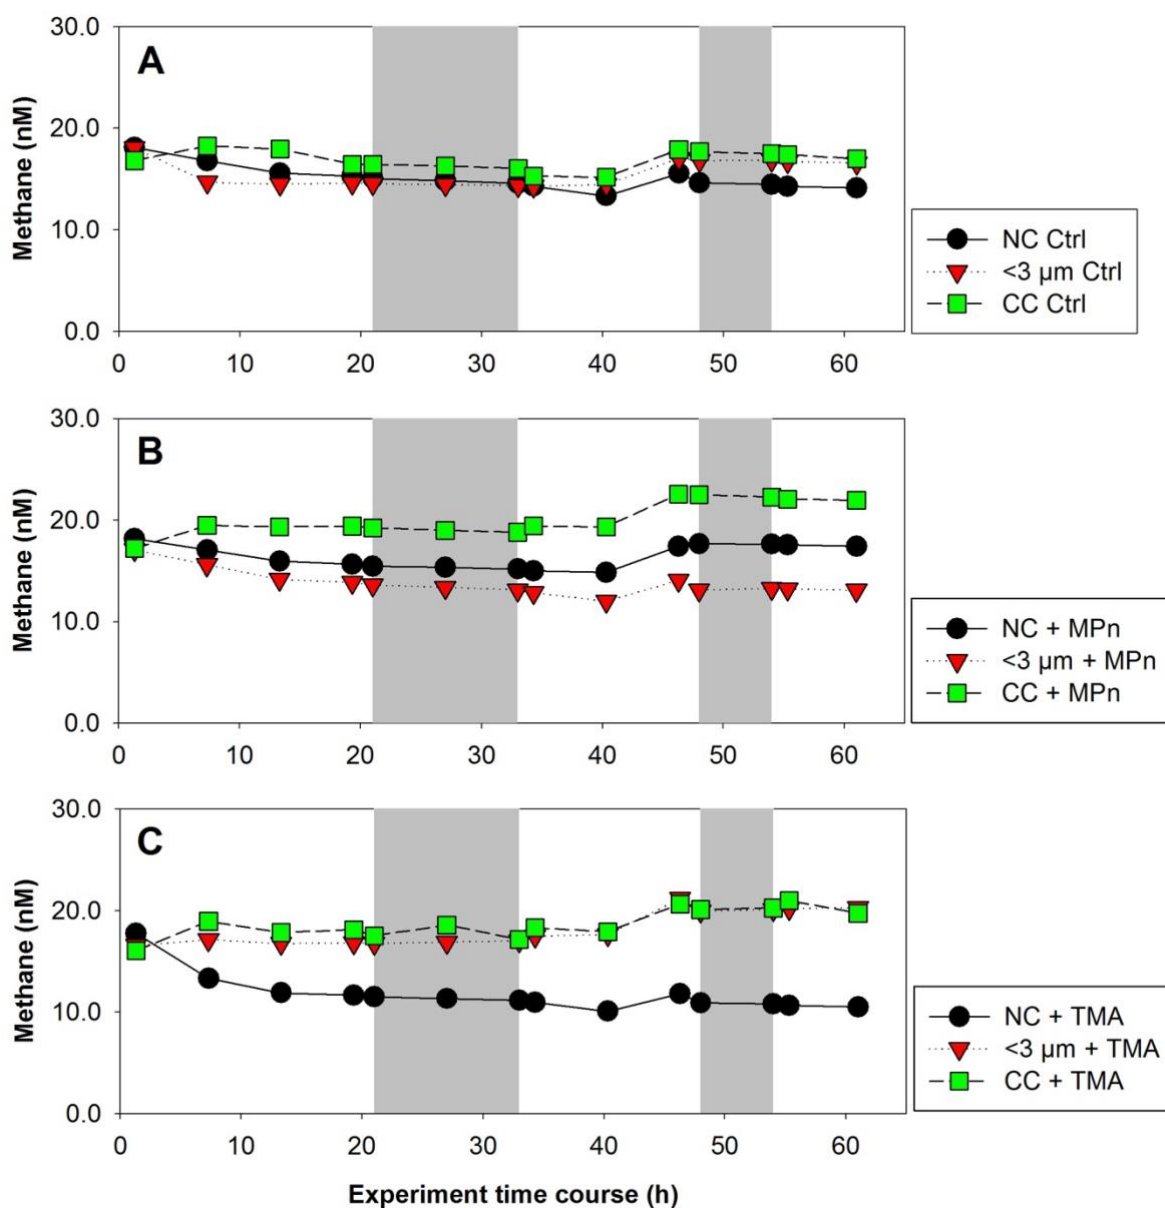

477





478 **Figure 5. Time courses of dissolved methane (nM) during incubation in long-term microcosm experiments (10L) with the addition**  
479 **of methylated substrates (MPn: methyl phosphonic acid and TMA: trimethylamine) performed with three planktonic communities**  
480 **(NC: natural community; <3 µm: bacterioplankton and CC: community concentrate) under oxygenated conditions in April 2019.**  
481 **Photoperiod is represented in white (light) and gray (dark).**

482  
483 Remarkably, Chl-a levels matched with phytoplankton communities expected in each treatment (Table S3). Mean Chl-a levels  
484 in the <3 µm fraction were 21.7 and 4.5 times lower than in the NC and CC, respectively (Table S3), indicating that this  
485 fraction contains phyto picoeukaryotes in a lower proportion than CC, and that NC included phyto- microeukaryotes that have  
486 the highest Chl-a concentration. Additionally, the CC treatment displayed higher basal levels of DOC and nutrients, due to the  
487 natural diurnal mortality of picoplankton (Llabrés et al., 2011) and to the type of filtration, tangential flow filtration, one of  
488 the most used methods to concentrate DOM (Benner et al., 1992) that reduces the amount of membrane sorption and fouling  
489 and is capable of filtering between 10 to 1000L (Minor et al., 2014).

490 When comparing the treatments (NC, <3 µm, and CC) without (controls) and with the addition of MPn and TMA ( 5),  
491 significant statistical differences (p<0.05) and a similar CH<sub>4</sub> evolution pattern were observed, with a slightly higher CH<sub>4</sub>  
492 accumulation during the second photoperiod, especially in the CC and <3 µm fractions (Fig. 5A), indicating that during the  
493 first photoperiod there may be changes and/or acclimation of planktonic communities.

494 With the addition of MPn (Fig. 5B), CH<sub>4</sub> evolution remained constant in the <3 µm fraction, but increased slightly and strongly  
495 in the CC and NC, respectively (Fig. 5B). The most significant difference in the CH<sub>4</sub> time course occurred when CC was  
496 enriched with MPn (Table S4), suggesting that both heterotrophic bacterioplankton or cyanobacteria could be mediating CH<sub>4</sub>  
497 regeneration. Additionally, higher chlorophyll concentrations (Table S3) in NC treatment may have supported greater CH<sub>4</sub>  
498 accumulation compared to the <3 µm fraction (Fig. 5B). Regarding TMA enrichment (Fig. 5C), the CC and <3 µm fraction  
499 treatments responded similarly, both increasing CH<sub>4</sub> accumulation (p<0.05; Fig. 5C). Higher accumulation rates were observed  
500 in the <3 µm fraction (Table S4), suggesting that the heterotrophic community present in this period weakly metabolizes TMA  
501 (De Angelis and Lee, 1994; Bižić-Ionescu et al., 2018).

502 Although the conversion of methylated substrates, such as MPn to CH<sub>4</sub> by various types of bacteria has been extensively  
503 documented (Repeta et al., 2016; Del Valle and Karl, 2014; Karl et al., 2008; Metcalf et al., 2012; Zhao et  
504 al., 2022; Wang et al., 2018; Damm et al., 2010), this process typically occurs under phosphorus-starved conditions.  
505 However, it is unlikely in our study area, which experienced high PO<sub>4</sub><sup>-3</sup> availability and even in excess compared to N (Table  
506 2). Specifically, the expression of phosphonate C-P lyase genes is restrained under P-rich culture conditions (Carini et al.,  
507 2014; Taenzer, 2019; Sosa et al., 2019). Thus, an alternative explanation for the significant CH<sub>4</sub> accumulation in the CC with  
508 MPn treatment could be related to the presence of cyanobacteria, since using stable isotope labelling techniques recently has  
509 shown that CH<sub>4</sub> production comes from cyanobacteria such as *Synechococcus* (Klitzsch et al., 2023).

510 Given that *Synechococcus* dominated during the non-upwelling period (autumn winter season) in the photic layer (Collado-  
511 Fabbri et al., 2011) it is plausible to consider CH<sub>4</sub> generation mediated by this microorganism in our upwelling system.



512 Consequently, CH<sub>4</sub> generation pathways appear multifaceted, involving complex interplays between photochemical and  
513 metabolic processes. The mechanism by which cyanobacteria effectively convert fixed CO<sub>2</sub> to CH<sub>4</sub> under light conditions  
514 appears intricately linked to the photosynthetic process (Bižić et al., 2020; Klintzsch et al., 2020), since inhibitors of  
515 photosynthesis blocked CH<sub>4</sub> production under light conditions (Bižić et al., 2020). This suggested that distinct mechanisms  
516 might govern CH<sub>4</sub> production under light and dark conditions, influenced by freshly synthesized photosynthetic products in  
517 light and storage compounds in darkness.

518 During the high productivity period (Phase I), temporal CH<sub>4</sub> accumulation consistently demonstrated higher CH<sub>4</sub> levels in the  
519 CC treatment compared to the NC and <3 μm fraction (controls) (Fig. 6A). However, a noteworthy contrast appears when  
520 considering the impact of substrate additions. Specifically, in this phase, the introduction of TMA in the CC treatment results  
521 in a more pronounced CH<sub>4</sub> regeneration (Fig. 6C) compared to the effect of MPn (Fig. 6B). This pattern, the opposite of that  
522 found in Phase II, could potentially be explained by the observed decrease in *Synechococcus* abundance (Fig. S3D), which  
523 remains unresponsive to MPn, and the concurrent increase in nano and picoeucaryotes and bacteria at the end of the experiment  
524 (Fig. S3E and F), the last of which is conducive to the action of TMA (Bižić-Ionescu et al., 2018; De Angelis and  
525 Lee, 1994; Lidbury et al., 2015). Indeed, a marked reduction in *Synechococcus* abundance was observed (showing a  
526 4.6-fold decrease) compared to the transition period (Fig. S4A and D), whereas nano- and picoeukaryotes experienced a notable  
527 abundance (3.1 to 3.7 times higher than the transition period) (Fig. S3B and E).

528

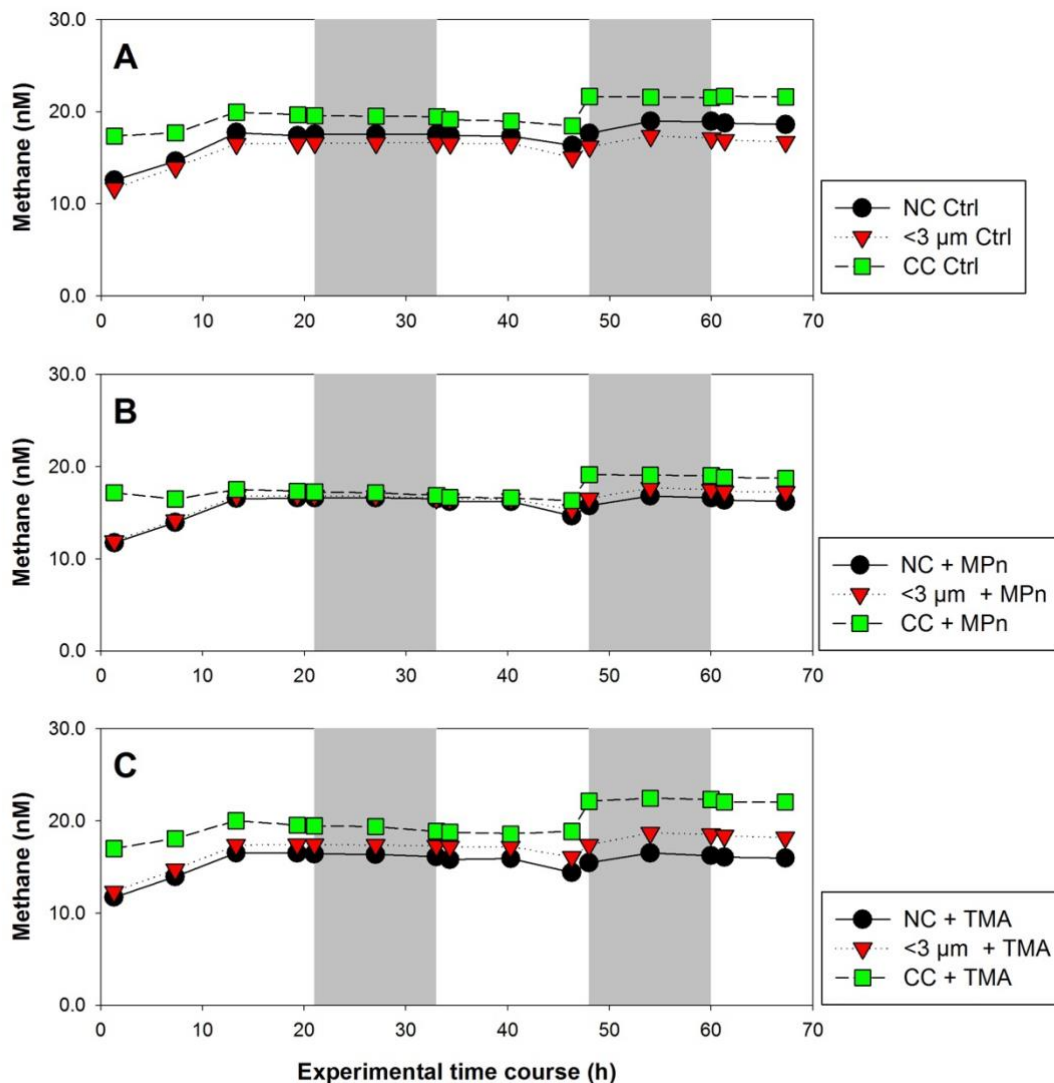

529

530 **Figure 6.** Time courses of dissolved methane (nM) during incubation in long-term microcosm experiments (10L) with the addition  
531 of methylated substrates (MPn: methyl phosphonic acid and TMA: trimethylamine) performed with three planktonic communities  
532 (NC: natural community; <3 μm: bacterioplankton and CC: community concentrate) under oxygenated conditions in September  
533 2019. Photoperiod is represented in white (light) and gray (dark).

534

535 In this phase, the distribution proportions within the NC treatment were as follows: cyanobacteria, nano and picoeukaryotes,  
536 and bacteria accounted for 1.1, 2.3 and 96.6, respectively. In contrast, within the CC treatment, the initial distribution

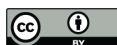

537 proportions were higher with respect to the NC: cyanobacteria, picoeukaryotes, and bacterioplankton displayed proportions  
538 1.6, 0.6, and 2.9 times greater, respectively. This underscores the increased significance of bacteria and autotrophic  
539 picoeukaryotes during this phase, as further corroborated by Chl-a measurements (Table S3).

540 An intricate interplay between microbial communities and CH<sub>4</sub> cycling within distinct phases of productivity is elucidated  
541 (Fig. 7). The prevalence of cyanobacteria, picoeukaryotes, and heterotrophic bacteria varied significantly between these  
542 phases. So, this indicates that substrate utilization is related to the availability of nutrients as well as the complexity of the  
543 substrate and the composition of the heterotrophic bacterial community, which depends on the productivity phases, potentially  
544 driving CH<sub>4</sub> production dynamics.

545

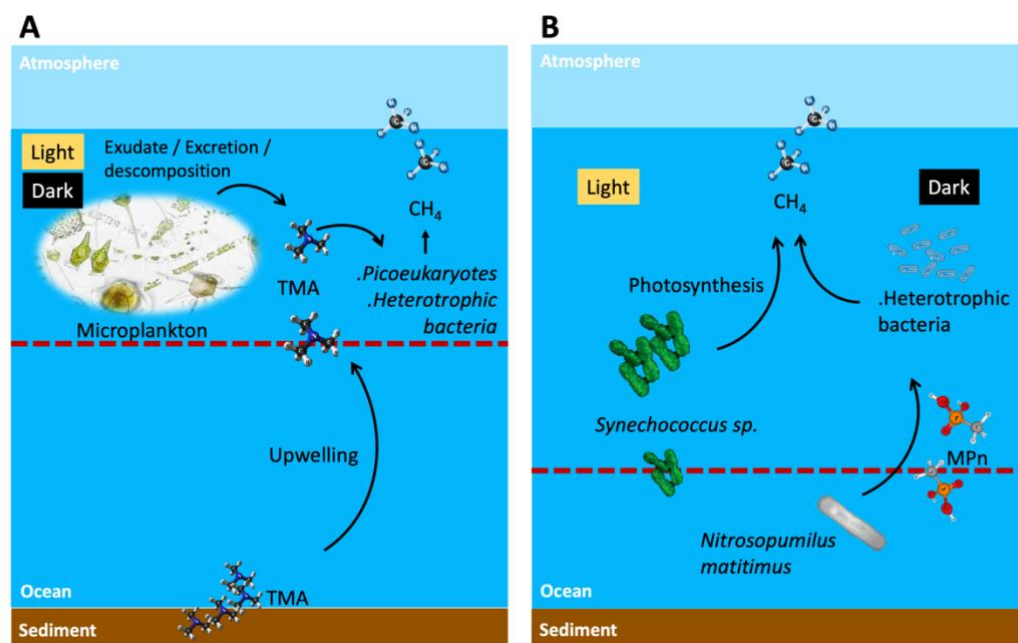

546

547 **Figure 7. Suggested scheme of methane cycling mechanisms in two contrasting periods of primary production and oceanographic**  
548 **conditions during light and dark phases, where potential planktonic communities and methylated substrates are involved to**  
549 **metabolize methane in surface waters. A. Phase I or active upwelling season and B. Phase II and III or late upwelling or non-**  
550 **upwelling season. Dashed line shows the 100 μmol L<sup>-1</sup> oxycline, above this line oxic methane is produced. TMA: trimethylamine;**  
551 **and MPn: methyl phosphonic acid.**

552

553 CC treatment always exhibited elevated CH<sub>4</sub> levels and therefore reflects the relative dominance of cyanobacteria in Phase II  
554 (autumn-winter), which are mediating CH<sub>4</sub> cycling via MPn. Indeed, high CH<sub>4</sub> levels in surface water observed in the non-  
555 upwelling period, even comparable to upwelling period, could be due to *in situ* production mediated by *Synechococcus*, or  
556 archaea such as *Nitrosopumilus maritimus* that are providing MPn to heterotrophic bacteria to be metabolized (cleaved) and



557 subsequently release CH<sub>4</sub> (Fig. 7A). On the other hand, although the trimethylamine methyltransferase enzyme has been  
558 described as involved in the demethylation of TMA in methanogen microorganisms (Paul et al., 2000), it cannot be ruled  
559 out that in the upwelling period, heterotrophic bacteria dominance in spring time can metabolize TMA through an alternative  
560 pathway still unknown (Fig. 7B). Nor can it be ruled out that the upwelling brings methanogens with the necessary machinery  
561 to metabolize TMA at the ocean surface.

#### 562 4 Conclusions

563 Overall, picoplankton recycled CH<sub>4</sub> in all experiments conducted in both light and dark conditions, although the net CH<sub>4</sub>  
564 production rate was higher in dark conditions. Moreover, laboratory experiments demonstrated that organic compounds such  
565 as TMA and MPn are metabolized by heterotrophic bacterioplankton, contributing to the recycling of oxic CH<sub>4</sub> in the  
566 oxygenated surface layer. This reflects the importance of these microorganisms in the gas' cycling, which could be sustaining  
567 the supersaturations and the presence of CH<sub>4</sub> hotspots in the surface layer.

568 Coastal upwelling could bring with it organic compounds such as TMA from sediments, which added to plankton  
569 decomposition compounds (e.g. TMA), and change in picoplanktonic composition (bacteria and the remarkable increase of  
570 pico- and nanoeukaryotes) during the favorable upwelling period, could promote recycling CH<sub>4</sub> via TMA, through a pathway  
571 that is still unknown, but would potentially add to CH<sub>4</sub> supersaturation in the oxygenated surface layer, beyond the contribution  
572 of CH<sub>4</sub> by advection.

573 *Synechococcus* could be responsible for CH<sub>4</sub> regeneration through photosynthesis. These cyanobacteria are abundant in the  
574 non-upwelling period, and together with other picoeukaryotes, maintain intermediate and basal Chl-a levels during this period  
575 that matched with higher DOC levels and inorganic N:P ratios (compared to the upwelling period). This may stimulate  
576 heterotrophic bacteria to metabolize MPn and thus contribute to the recycling of oxic CH<sub>4</sub>.

577 It is important to note that amended experiments were conducted in Phase II (March 2019) and phase III (May 2019), periods  
578 marked by changes in the phytoplankton succession (composition), biomass and abundance (Testa et al., 2018). In winter, the  
579 relative abundance of picoplankton with respect to microplankton (particularly the presence of *Synechococcus* and nitrifying  
580 *archaea*) increases significantly, especially photosynthetic picoeukaryotes (Collado-Fabbri et al., 2011).

581 **Acknowledgements** Thanks to Gerardo Garcia for his experience and teaching in the use of laboratory equipment and his help  
582 in setting up the experiments; and Karen Sanzana for nutrient analysis; Oliver Alarcon for oxygen analysis. Both the crew of  
583 R/V Kay Kay (II) and the Dichato Marine Station of the University of Concepcion provided valuable help during fieldwork,  
584 as well as all participating colleagues in the time series station (University of Concepcion), who provided the core  
585 measurements. We also appreciate the work done during the COVID pandemic by Juan Faúndez. This research was funded  
586 by the Fondo Nacional de Investigaciones Científicas y Tecnológicas (FONDECYT) grant N° 1200861 and also Millennium  
587 Science Initiative Program ICM 2019-015 (SECOS) and CR2 FONDAP-CONICYT N° 1522A001.

588



589 **References**

- 590 Aguirre, C., Garreaud, R., Belmar, L., Farías, L., Ramajo, L., and Barrera, F.: High-Frequency Variability of the Surface Ocean  
591 Properties Off Central Chile During the Upwelling Season, *Front Mar Sci*, 8, 1–19,  
592 <https://doi.org/10.3389/fmars.2021.702051>, 2021.
- 593 Aldunate, M., De la Iglesia, R., Bertagnolli, A. D., and Ulloa, O.: Oxygen modulates bacterial community composition in the  
594 coastal upwelling waters off central Chile, *Deep Sea Research Part II Topical Studies in Oceanography*, 156, 68–79,  
595 <https://doi.org/10.1016/j.dsr2.2018.02.001>, 2018.
- 596 Allen, L. Z., Allen, E. E., Badger, J. H., McCrow, J. P., Paulsen, I. T., Elbourne, L. D., Thiagarajan, M., Rusch, D. B., Nealson,  
597 K. H., Williamson, S. J., Venter, J. C., and Allen, A. E.: Influence of nutrients and currents on the genomic composition of  
598 microbes across an upwelling mosaic, *ISME Journal*, 6, 1403–1414, <https://doi.org/10.1038/ismej.2011.201>, 2012.
- 599 Anabalón, V., Morales, C. E., Escribano, R., Varas, A. M., and Varas, M. A.: The contribution of nano- and micro-planktonic  
600 assemblages in the surface layer (0-30 m) under different hydrographic conditions in the upwelling area off Concepción,  
601 central Chile, *Prog Oceanogr*, 75, 396–414, <https://doi.org/10.1016/j.pocean.2007.08.023>, 2007.
- 602 De Angelis, M. A. and Lee, C.: Methane production during zooplankton grazing on marine phytoplankton, *Limnol. Oceanogr.*,  
603 39, 1298–1308, 1994.
- 604 Azam, F. and Malfatti, F.: Microbial structuring of marine ecosystems, *Nat Rev Microbiol*, 5, 782–791,  
605 <https://doi.org/10.1038/nrmicro1747>, 2007.
- 606 Azam, F., Fenchel, T., Field, J., Gray, J., Meyer-Reil, L., and Thingstad, F.: The Ecological Role of Water-Column Microbes  
607 in the Sea, *Mar Ecol Prog Ser*, 10, 257–263, <https://doi.org/10.3354/meps010257>, 1983.
- 608 Bange, H. W., Bartell, U. H., Rapsomanikis, S., and Andreae, M. O.: Methane in the Baltic and North Seas and a reassessment  
609 of the marine emissions of methane, *Global Biogeochem Cycles*, 8, 465–480, 1994.
- 610 Bates, T. S., Kelly, K. C., Johnson, J. E., and Gammon, R. H.: A reevaluation of the open ocean source of methane to the  
611 atmosphere, *Journal of Geophysical Research Atmospheres*, 101, 6953–6961, <https://doi.org/10.1029/95JD03348>, 1996.
- 612 Bauer, J. and Druffel, E.: Ocean margins as a significant source of organic matter to the deep open ocean, *Letter to nature*,  
613 392, 482–485, <https://doi.org/https://doi.org/10.1038/33122>, 1998.
- 614 Bello, E.: Variabilidad estacional en la descarga de metano disuelto desde un sistema estuarino a la zona marina adyacente, el  
615 caso de ríos de la zona central de Chile (río Itata), Universidad de Concepción, 76 pp., 2016.
- 616 Belviso, S., Kim, S. -K., Rassoulzadegan, F., Krajka, B., Nguyen, B. C., Mihalopoulos, N., and Buat-Menard, P.: Production  
617 of dimethylsulfonium propionate (DMSP) and dimethylsulfide (DMS) by a microbial food web, *Limnol Oceanogr*, 35, 1810–  
618 1821, <https://doi.org/10.4319/lo.1990.35.8.1810>, 1990.
- 619 Benner, R., Dean Pakulski, J., McCarthy, M., Hedges, J. I., Hatcher, P. G., Benner, R., Pakulski, J. D., McCarthy, M., Hedges,  
620 J. I., Hatcher, P. G., H van Beest, B. W., Kramer, G. J., and van Santen, R. A.: Bulk chemical characteristics of dissolved  
621 organic matter in the ocean, *J. Glinnemann, ibid*, 255, 1561–1564, <https://doi.org/DOI: 10.1126/science.255.5051.1561>, 1992.





- 622 Berg, A., Lindblad, P., and Svensson, B. H.: Cyanobacteria as a source of hydrogen for methane formation, *World J Microbiol*  
623 *Biotechnol*, 30, 539–545, <https://doi.org/10.1007/s11274-013-1463-5>, 2014.
- 624 Bizic, M.: Phytoplankton photosynthesis: An unexplored source of biogenic methane emission from oxic environments, *J*  
625 *Plankton Res*, 43, 822–830, <https://doi.org/10.1093/plankt/fbab069>, 2021.
- 626 Bižić, M., Klintzsch, T., Ionescu, D., Hindiyeh, M. Y., Günthel, M., Muro-Pastor, A. M., Eckert, W., Urich, T., Keppler, F.,  
627 and Grossart, H. P.: Aquatic and terrestrial cyanobacteria produce methane, *Sci Adv*, 6, 1–10,  
628 <https://doi.org/10.1126/sciadv.aax5343>, 2020.
- 629 Bižić-Ionescu, M., Ionescu, D., Günthel, M., Tang, K. W., and Grossart, H. P.: Oxic Methane Cycling: New Evidence for  
630 Methane Formation in Oxic Lake Water, *Biogenesis of Hydrocarbons*, 1–22, <https://doi.org/10.1007/978-3-319-53114-4>, 2018.
- 631 Brown, I. J., Torres, R., and Rees, A. P.: The origin of sub-surface source waters define the sea-air flux of methane in the  
632 Mauritanian Upwelling, NW Africa, *Dynamics of Atmospheres and Oceans*, 67, 39–46,  
633 <https://doi.org/10.1016/j.dynatmoce.2014.06.001>, 2014.
- 634 Bullister, J. L., Wisegarver, D. P., and Wilson, S. T.: The production of Methane and Nitrous Oxide Gas Standards for  
635 Scientific Committee on Ocean Research (SCOR) Working Group #143, 1–9 pp., 2016.
- 636 Capelle, D. W. and Tortell, P. D.: Factors controlling methane and nitrous-oxide variability in the southern British Columbia  
637 coastal upwelling system, *Mar Chem*, 179, 56–67, <https://doi.org/10.1016/j.marchem.2016.01.011>, 2016.
- 638 Carini, P., White, A. E., Campbell, E. O., and Giovannoni, S. J.: Methane production by phosphate-starved SAR11  
639 chemoheterotrophic marine bacteria, *Nat Commun*, 5, 1–7, <https://doi.org/10.1038/ncomms5346>, 2014.
- 640 Carpenter, L. J., Archer, S. D., and Beale, R.: Ocean-atmosphere trace gas exchange, *Chem Soc Rev*, 41, 6473–6506,  
641 <https://doi.org/10.1039/c2cs35121h>, 2012.
- 642 Cerbin, S., Pérez, G., Rybak, M., Wejnerowski, Ł., Konowalczyk, A., Helmsing, N., Naus-Wiezer, S., Meima-Franke, M.,  
643 Pytlak, Ł., Raaijmakers, C., Nowak, W., and Bodelier, P. L. E.: Methane-Derived Carbon as a Driver for Cyanobacterial  
644 Growth, *Front Microbiol*, 13, 1–16, <https://doi.org/10.3389/fmicb.2022.837198>, 2022.
- 645 Codispoti, L. A.: Is the ocean losing nitrate?, *Nature*, 376, 724, <https://doi.org/10.1038/376724a0>, 1995.
- 646 Collado-Fabbri, S., Vaultot, D., and Ulloa, O.: Structure and seasonal dynamics of the eukaryotic picophytoplankton  
647 community in a wind-driven coastal upwelling ecosystem, *Limnol. Oceanogr.*, 56, 2334–2346,  
648 <https://doi.org/10.4319/lo.2011.56.6.2334>, 2011.
- 649 Cuevas, L. A., Daneri, G., Jacob, B., and Montero, P.: Microbial abundance and activity in the seasonal upwelling area off  
650 Concepción (~36°S), central Chile: A comparison of upwelling and non-upwelling conditions, *Deep Sea Res 2 Top Stud*  
651 *Oceanogr*, 51, 2427–2440, <https://doi.org/10.1016/j.dsr2.2004.07.026>, 2004.
- 652 Damm, E., Helmke, E., Thoms, S., Schauer, U., Nöthig, E., Bakker, K., and Kiene, R. P.: Methane production in aerobic  
653 oligotrophic surface water in the central Arctic Ocean, *Biogeosciences*, 7, 1099–1108, [https://doi.org/10.5194/bgd-6-10355-](https://doi.org/10.5194/bgd-6-10355-2009)  
654 2009, 2010.

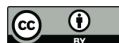

- 655 Dinasquet, J., Tiirola, M., and Azam, F.: Enrichment of Bacterioplankton Able to Utilize One-Carbon and Methylated  
656 Compounds in the Coastal Pacific Ocean, *Front Mar Sci*, 5, 1–13, <https://doi.org/10.3389/fmars.2018.00307>, 2018.
- 657 Donis, D., Flury, S., Stöckli, A., Spangenberg, J. E., Vachon, D., and McGinnis, D. F.: Full-scale evaluation of methane  
658 production under oxic conditions in a mesotrophic lake, *Nat Commun*, 8, 1–11, <https://doi.org/10.1038/s41467-017-01648-4>,  
659 2017.
- 660 Dumestre, J. F., Guézennec, J., Galy-Lacaux, C., Delmas, R., Richard, S., and Labroue, L.: Influence of light intensity on  
661 methanotrophic bacterial activity in Petit Saut Reservoir, French Guiana, *Appl Environ Microbiol*, 65, 534–539,  
662 <https://doi.org/10.1128/aem.65.2.534-539.1999>, 1999.
- 663 Emeis, K., Eggert, A., Flohr, A., Lahajnar, N., Nausch, G., Neumann, A., Rixen, T., Schmidt, M., Van der Plas, A., and  
664 Wasmund, N.: Biogeochemical processes and turnover rates in the Northern Benguela Upwelling System, *Journal of Marine*  
665 *Systems*, 188, 63–80, <https://doi.org/10.1016/j.jmarsys.2017.10.001>, 2018.
- 666 Farías, L., Graco, M., and Ulloa, O.: Temporal variability of nitrogen cycling in continental-shelf sediments of the upwelling  
667 ecosystem off central Chile, *Deep Sea Res 2 Top Stud Oceanogr*, 51, 2491–2505, <https://doi.org/10.1016/j.dsr2.2004.07.029>,  
668 2004.
- 669 Farías, L., Fernández, C., Faúndez, J., Cornejo, M., and Alcaman, M. E.: Chemolithoautotrophic production mediating the  
670 cycling of the greenhouse gases N<sub>2</sub>O and CH<sub>4</sub> in an upwelling ecosystem, *Biogeosciences*, 6, 3053–3069,  
671 <https://doi.org/https://doi.org/10.5194/bg-6-3053-2009>, 2009.
- 672 Farías, L., Besoain, V., and García-Loyola, S.: Presence of nitrous oxide hotspots in the coastal upwelling area off central  
673 Chile: An analysis of temporal variability based on ten years of a biogeochemical time series, *Environmental Research Letters*,  
674 10, 1–13, <https://doi.org/10.1088/1748-9326/10/4/044017>, 2015.
- 675 Farías, L., Tenorio, S., Sanzana, K., and Faundez, J.: Temporal methane variability in the water column of an area of seasonal  
676 coastal upwelling: A study based on a 12 year time series, *Prog Oceanogr*, 195, <https://doi.org/10.1016/j.pocean.2021.102589>,  
677 2021.
- 678 Fazi, S., Amalfitano, S., Venturi, S., Pacini, N., Vazquez, E., Olaka, L. A., Tassi, F., Crognale, S., Herzsprung, P., Lechtenfeld,  
679 O. J., Cabassi, J., Capecciacci, F., Rossetti, S., Yakimov, M. M., Vaselli, O., Harper, D. M., and Butturini, A.: High  
680 concentrations of dissolved biogenic methane associated with cyanobacterial blooms in East African lake surface water,  
681 *Commun Biol*, 4, 1–12, <https://doi.org/10.1038/s42003-021-02365-x>, 2021.
- 682 Ferderlman, T. G., Lee, C., Pantoja, S., Harder, J., Bebout, B. M., and Fossing, H.: Sulfate reduction and methanogenesis in a  
683 Thioploca- dominates sediment off the coast of Chile, *Geochim Cosmochim Acta*, 61, 3065–3079,  
684 [https://doi.org/https://doi.org/10.1016/S0016-7037\(97\)00158-0](https://doi.org/https://doi.org/10.1016/S0016-7037(97)00158-0), 1997.
- 685 Fernandez, C. and Farías, L.: Assimilation and regeneration of inorganic nitrogen in a coastal upwelling system: Ammonium  
686 and nitrate utilization, *Mar Ecol Prog Ser*, 451, 1–14, <https://doi.org/10.3354/meps09683>, 2012.



- 687 Fernandez, C., González, M. L., Muñoz, C., Molina, V., and Farias, L.: Temporal and spatial variability of biological nitrogen  
688 fixation off the upwelling system of central Chile (35–38.5°S), *J Geophys Res Oceans*, 120, 3330–3349,  
689 <https://doi.org/10.1002/2014JC010410>, 2015.
- 690 Florez-Leiva, L., Damm, E., Farías, L., and Farias, L.: Methane production induced by dimethylsulfide in surface water of an  
691 upwelling ecosystem, *Prog Oceanogr*, 112–113, 38–48, <https://doi.org/10.1016/j.pocean.2013.03.005>, 2013.
- 692 Gibb, S. W., Mantoura, R. F. C., Liss, P. S., and Barlow, R. G.: Distributions and biogeochemistries of methylamines and  
693 ammonium in the Arabian Sea, *Deep Sea Res 2 Top Stud Oceanogr*, 46, 593–615, [https://doi.org/10.1016/S0967-0645\(98\)00119-2](https://doi.org/10.1016/S0967-0645(98)00119-2), 1999.
- 695 Giovannoni, S. J., Delong, E. F., Schmidt, T. M., and Pace, N. R.: Tangential Flow Filtration and Preliminary Phylogenetic  
696 Analysis of Marine Picoplankton, *Appl Environ Microbiol*, 56, 2572–2575, 1990.
- 697 González, H. E., Menschel, E., Aparicio, C., and Barría, C.: Spatial and temporal variability of microplankton and detritus,  
698 and their export to the shelf sediments in the upwelling area off Concepción, Chile (~36°S), during 2002–2005, *Prog Oceanogr*,  
699 75, 435–451, <https://doi.org/10.1016/j.pocean.2007.08.025>, 2007.
- 700 Grossart, H. P., Frindte, K., Dziallas, C., Eckert, W., and Tang, K. W.: Microbial methane production in oxygenated water  
701 column of an oligotrophic lake, *Proc Natl Acad Sci U S A*, 108, 19657–19661, <https://doi.org/10.1073/pnas.1110716108>,  
702 2011.
- 703 Günthel, M., Donis, D., Kirillin, G., Ionescu, D., Bizic, M., McGinnis, D. F., Grossart, H. P., and Tang, K. W.: Contribution  
704 of oxic methane production to surface methane emission in lakes and its global importance, *Nat Commun*, 10,  
705 <https://doi.org/10.1038/s41467-019-13320-0>, 2019.
- 706 Günthel, M., Klawonn, I., Woodhouse, J., Bižić, M., Ionescu, D., Ganzert, L., Kümmel, S., Nijenhuis, I., Zoccarato, L.,  
707 Grossart, H. P., and Tang, K. W.: Photosynthesis-driven methane production in oxic lake water as an important contributor to  
708 methane emission, *Limnol Oceanogr*, 1–13, <https://doi.org/10.1002/lno.11557>, 2020.
- 709 Hahn, M. W.: Broad diversity of viable bacteria in “sterile” (0.2 μm) filtered water, *Res Microbiol*, 155, 688–691,  
710 <https://doi.org/10.1016/j.resmic.2004.05.003>, 2004.
- 711 Hansell, D. A. and Orellana, M. V.: Dissolved organic matter in the global ocean: A primer, *Gels*, 7, 1–8,  
712 <https://doi.org/10.3390/gels7030128>, 2021.
- 713 Harmsen, M., van Vuuren, D. P., Bodirsky, B. L., Chateau, J., Durand-Lasserre, O., Drouet, L., Fricko, O., Fujimori, S.,  
714 Gernaat, D. E. H. J., Hanaoka, T., Hilaire, J., Keramidas, K., Luderer, G., Moura, M. C. P., Sano, F., Smith, S. J., and Wada,  
715 K.: The role of methane in future climate strategies: mitigation potentials and climate impacts, *Clim Change*, 163, 1409–1425,  
716 <https://doi.org/10.1007/s10584-019-02437-2>, 2020.
- 717 Hartmann, J. F., Günthel, M., Klintzsch, T., Kirillin, G., Grossart, H. P., Keppler, F., and Isenbeck-Schröter, M.: High  
718 Spatiotemporal Dynamics of Methane Production and Emission in Oxic Surface Water, *Environ Sci Technol*, 54, 1451–1463,  
719 <https://doi.org/10.1021/acs.est.9b03182>, 2020.



- 720 Herndl, G. and Malacic, V.: Impact of the pycnocline layer on bacterioplankton: diel and spatial variations in microbial  
721 parameters in the stratified water column of the Gulf of Trieste (Northern Adriatic Sea), *Mar Ecol Prog Ser*, 38, 295–303,  
722 <https://doi.org/10.3354/meps038295>, 1987.
- 723 Holmkvist, L., Arning, E. T., Küster-Heins, K., Vandieken, V., Peckmann, J., Zabel, M., and Jørgensen, B. B.: Phosphate  
724 geochemistry, mineralization processes, and Thioploca distribution in shelf sediments off central Chile, *Mar Geol*, 277, 61–  
725 72, <https://doi.org/10.1016/j.margeo.2010.08.011>, 2010.
- 726 Igarza, M., Dittmar, T., Graco, M., and Niggemann, J.: Dissolved organic matter cycling in the coastal upwelling system off  
727 central Peru during an “El Niño” year, *Front Mar Sci*, 6, 1–17, <https://doi.org/10.3389/fmars.2019.00198>, 2019.
- 728 IPCC: Climate Change 2021: The Physical Science Basis. Working Group I Contribution to the IPCC Sixth Assessment  
729 Report, Cambridge University Press, 35–144 pp., 2021.
- 730 Johnson, P. W. and Sieburth, J. M. N.: Chroococcoid cyanobacteria in the sea: A ubiquitous and diverse phototrophic biomass,  
731 *Limnol Oceanogr*, 24, 928–935, <https://doi.org/10.4319/lo.1979.24.5.0928>, 1979.
- 732 Kara, A. B., Rochford, P. A., and Hurlburt, H. E.: Mixed layer depth variability over the global ocean, *J Geophys Res Oceans*,  
733 108, 1–15, <https://doi.org/10.1029/2000jc000736>, 2003.
- 734 Karl, D., Beversdorf, L., Björkman, K., Church, M., Martinez, A., and DeLong, E.: Aerobic production of methane in the sea,  
735 *Nat Geosci*, 1, 473–478, <https://doi.org/10.1038/ngeo234>, 2008.
- 736 Kelley, C. A. and Jeffrey, W. H.: Dissolved methane concentration profiles and air-sea fluxes from 41°S to 27°N, *Global*  
737 *Biogeochem Cycles*, 16, 1–6, <https://doi.org/10.1029/2001gb001809>, 2002.
- 738 Klintzsch, T., Langer, G., Nehrke, G., Wieland, A., Lenhart, K., and Keppler, F.: Methane production by three widespread  
739 marine phytoplankton species: release rates, precursor compounds, and relevance for the environment, *Biogeosciences*, 16,  
740 4129–4144, <https://doi.org/10.5194/bg-2019-245>, 2019.
- 741 Klintzsch, T., Langer, G., Wieland, A., Geisinger, H., Lenhart, K., Nehrke, G., and Keppler, F.: Effects of Temperature and  
742 Light on Methane Production of Widespread Marine Phytoplankton, *J Geophys Res Biogeosci*, 125, 1–16,  
743 <https://doi.org/10.1029/2020JG005793>, 2020.
- 744 Klintzsch, T., Geisinger, H., Wieland, A., Langer, G., Nehrke, G., Bizic, M., Greule, M., Lenhart, K., Borsch, C., Schroll, M.,  
745 and Keppler, F.: Stable Carbon Isotope Signature of Methane Released From Phytoplankton, *Geophys Res Lett*, 50, 1–12,  
746 <https://doi.org/10.1029/2023gl103317>, 2023.
- 747 Kock, A., Gebhardt, S., and Bange, H. W. W.: Methane emissions from the upwelling area off Mauritania (NW Africa),  
748 *Biogeosciences*, 5, 1119–1125, <https://doi.org/10.5194/bg-5-1119-2008>, 2008.
- 749 De La Iglesia, R., Echenique-Subiabre, I., Rodríguez-Marconi, S., Espinoza, J. P., Von Dassow, P., Ulloa, O., and Trefault,  
750 N.: Distinct oxygen environments shape picoeukaryote assemblages thriving oxygen minimum zone waters off central Chile,  
751 *J Plankton Res*, 42, 514–529, <https://doi.org/10.1093/plankt/fbaa036>, 2020.
- 752 Lamontagne, R. A., Swinnerton, J. W., Linnenbom, V. J., and Smith, W. D.: Methane Concentrations in Various Marine  
753 Environments, *J Geophys Res*, 78, 5317–5324, <https://doi.org/10.1029/JC078i024p05317>, 1973.



- 754 Lenhart, K., Klintzsch, T., Langer, G., Nehrke, G., Bunge, M., Schnell, S., and Keppler, F.: Evidence for methane production  
755 by the marine algae *Emiliania huxleyi*, *Biogeosciences*, 13, 3163–3174, <https://doi.org/10.5194/bg-13-3163-2016>, 2016.
- 756 León-Palmero, E., Contreras-Ruiz, A., Sierra, A., Morales-Baquero, R., and Reche, I.: Dissolved CH<sub>4</sub> coupled to  
757 photosynthetic picoeukaryotes in oxic waters and to cumulative chlorophyll a in anoxic waters of reservoirs, *Biogeosciences*,  
758 17, 1–23, <https://doi.org/10.5194/bg-17-3223-2020>, 2020.
- 759 Li, Y., Fichot, C. G., Geng, L., Scarratt, M. G., and Xie, H.: The Contribution of Methane Photoproduction to the Oceanic  
760 Methane Paradox, *Geophys Res Lett*, 47, 1–10, <https://doi.org/10.1029/2020GL088362>, 2020.
- 761 Lidbury, I. D. E. A., Murrell, J. C., and Chen, Y.: Trimethylamine and trimethylamine N-oxide are supplementary energy  
762 sources for a marine heterotrophic bacterium: Implications for marine carbon and nitrogen cycling, *ISME Journal*, 9, 760–769,  
763 <https://doi.org/10.1038/ismej.2014.149>, 2015.
- 764 Liu, L.-Y., Xie, G.-J., Ding, J., Liu, B.-F., Xing, D.-F., Ren, N.-Q., and Wang, Q.: Microbial methane emissions from the non-  
765 methanogenesis processes: A critical review, *Science of the Total Environment*, 806, 1–11,  
766 <https://doi.org/10.1016/j.scitotenv.2021.151362>, 2022.
- 767 Llabrés, M., Agustí, S., and Herndl, G. J.: Diel in situ picophytoplankton cell death cycles coupled with cell division, *J Phycol*,  
768 47, 1247–1257, <https://doi.org/10.1111/j.1529-8817.2011.01072.x>, 2011.
- 769 Lohrer, C., Cwierz, P. P., Wirth, M. A., Schulz-Bull, D. E., and Kanwischer, M.: Methodological aspects of methylphosphonic  
770 acid analysis: Determination in river and coastal water samples, *Talanta*, 211, 1–8,  
771 <https://doi.org/10.1016/j.talanta.2020.120724>, 2020.
- 772 Macías-Zamora, J.: Dissolved methane in the sills region of the Gulf of California, *Cienc Mar*, 39, 119–135,  
773 <https://doi.org/10.7773/cm.v39i2.2232>, 2013.
- 774 McAuliffe, C.: Solubility in water of C1-C9 hydrocarbons, *Nature*, 200, 1092–1093, 1963.
- 775 Metcalf, W. W., Griffin, B. M., Cicchillo, R., Gao, J., Janga, S., Cooke, H., Circello, B., Evans, B., Martens-Habbena, W.,  
776 Stahl, D., and Van Der Donk, W.: Synthesis of Methylphosphonic Acid by Marine Microbes: A Source for Methane in the  
777 Aerobic Ocean, *Science* (1979), 337, 1104–1107, <https://doi.org/10.1126/science.1219875>, 2012.
- 778 Minor, E. C., Swenson, M. M., Mattson, B. M., and Oyler, A. R.: Structural characterization of dissolved organic matter: A  
779 review of current techniques for isolation and analysis, *Environmental Sciences: Processes and Impacts*, 16, 2064–2079,  
780 <https://doi.org/10.1039/c4em00062e>, 2014.
- 781 Molina, V., Belmar, L., Levipan, H. A., Ramírez-Flandes, S., Anguita, C., Galán, A., Montes, I., and Ulloa, O.: Spatiotemporal  
782 Distribution of Key Pelagic Microbes in a Seasonal Oxygen-Deficient Coastal Upwelling System of the Eastern South Pacific  
783 Ocean, *Front Mar Sci*, 7, 1–17, <https://doi.org/10.3389/fmars.2020.561597>, 2020.
- 784 Monteiro, P. M. S., Van Der Plas, A., Mohrholz, V., Mabilhe, E., Pascall, A., and Joubert, W.: Variability of natural hypoxia  
785 and methane in a coastal upwelling system: Oceanic physics or shelf biology?, *Geophys Res Lett*, 33, 1–5,  
786 <https://doi.org/10.1029/2006GL026234>, 2006.



- 787 Mopper, K., Kieber, D. J., and Stubbins, A.: Marine Photochemistry of Organic Matter: Processes and Impacts. Processes and  
788 Impacts., in: Biogeochemistry of Marine Dissolved Organic Matter: Second Edition, Elsevier Inc., 389–450,  
789 <https://doi.org/10.1016/B978-0-12-405940-5.00008-X>, 2015.
- 790 Morales, C. and Anabalón, V.: Phytoplankton biomass and microbial abundances during the spring upwelling season in the  
791 coastal area off Concepción, central-southern Chile: Variability around a time series station, *Prog Oceanogr*, 92–95, 81–91,  
792 <https://doi.org/10.1016/j.pocean.2011.07.004>, 2012.
- 793 Morales, C., González, H. E., Hormazabal, S. E., Yuras, G., Letelier, J., and Castro, L. R.: The distribution of chlorophyll- a  
794 and dominant planktonic components in the coastal transition zone off Concepción, central Chile, during different  
795 oceanographic conditions, *Prog Oceanogr*, 75, 452–469, <https://doi.org/10.1016/j.pocean.2007.08.026>, 2007.
- 796 Morán, X. A. G., Estrada, M., Gasol, J. M., and Pedrós-Alió, C.: Dissolved primary production and the strength of  
797 phytoplankton-bacterioplankton coupling in contrasting marine regions, *Microb Ecol*, 44, 217–223,  
798 <https://doi.org/10.1007/s00248-002-1026-z>, 2002.
- 799 Morgan, E. J., Lavric, J. V., Arévalo-Martínez, D. L., Bange, H. W., Steinhoff, T., Seifert, T., and Heimann, M.: Air-sea fluxes  
800 of greenhouse gases and oxygen in the northern Benguela Current region during upwelling events, *Biogeosciences*, 16, 4065–  
801 4084, <https://doi.org/10.5194/bg-16-4065-2019>, 2019.
- 802 Muñoz-Marín, M. C., Gómez-Baena, G., López-Lozano, A., Moreno-Cabezuelo, J. A., Díez, J., and García-Fernández, J. M.:  
803 Mixotrophy in marine picocyanobacteria: use of organic compounds by *Prochlorococcus* and *Synechococcus*,  
804 <https://doi.org/10.1038/s41396-020-0603-9>, 1 May 2020.
- 805 Paul, L., Ferguson, D. J., and Krzycki, J. A.: The Trimethylamine Methyltransferase Gene and Multiple Dimethylamine  
806 Methyltransferase Genes of *Methanosarcina barkeri* Contain In-Frame and Read-Through Amber Codons †, *J Bacteriol*, 182,  
807 2520–2529, <https://doi.org/10.1128/JB.182.11.2520-2529.2000>, 2000.
- 808 Pomeroy, L. R., Williams, P. J. L., Azam, F., and Hobbie, J. E.: The Microbial Loop, *Source: Oceanography*, 20, 28–33,  
809 [https://doi.org/https://doi.org/10.5670/oceanog.2007.45](https://doi.org/10.5670/oceanog.2007.45), 2007.
- 810 Rain-Franco, A., Sobarzo, M., Caparros, J., and Fernandez, C.: Variability of chromophoric dissolved organic matter in three  
811 freshwater-influenced systems along central-southern Chile, *Prog Oceanogr*, 174, 154–161,  
812 <https://doi.org/10.1016/j.pocean.2018.09.009>, 2019.
- 813 Raven, J. A.: The twelfth Tansley Lecture. Small is beautiful: The picophytoplankton, *Funct Ecol*, 12, 503–513,  
814 <https://doi.org/10.1046/j.1365-2435.1998.00233.x>, 1998.
- 815 Redfield, A. C., Ketchum, B. H., and Richards, F. A.: The influence of organisms on the composition of sea water, *The sea*,  
816 2, 26–77, 1963.
- 817 Reeburgh, W. S.: Oceanic methane biogeochemistry, *American Chemical Society*, 107, 486–513,  
818 <https://doi.org/10.1021/cr050362v>, 2007.





- 819 Reintjes, G., Fuchs, B. M., Scharfe, M., Wiltshire, K. H., Amann, R., and Arnosti, C.: Short-term changes in polysaccharide  
820 utilization mechanisms of marine bacterioplankton during a spring phytoplankton bloom, *Environ Microbiol*, 22, 1884–1900,  
821 <https://doi.org/10.1111/1462-2920.14971>, 2020.
- 822 Repeta, D. J., Ferrón, S., Sosa, O. A., Johnson, C. G., Repeta, L. D., Acker, M., DeLong, E. F., and Karl, D. M.: Marine  
823 methane paradox explained by bacterial degradation of dissolved organic matter, *Nat Geosci*, 9, 1–7,  
824 <https://doi.org/10.1038/ngeo2837>, 2016.
- 825 Sansone, F. J., Popp, B. N., Gasc, A., Graham, A. W., and Rust, T. M.: Highly elevated methane in the Eastern tropical North  
826 Pacific and associated isotopically enriched fluxes to the atmosphere, *Geophys Res Lett*, 28, 4567–4570,  
827 <https://doi.org/10.1029/2001GL013460>, 2001.
- 828 Saunois, M., Stavert, A. R., Poulter, B., Bousquet, P., Canadell, J. G., Jackson, R. B., Raymond, P. A., Dlugokencky, E. J.,  
829 and Houweling, S.: The Global Methane Budget 2000 – 2017, *Earth Syst Sci Data*, 12, 1561–1623,  
830 <https://doi.org/10.5194/essd-12-1561-2020>, 2020.
- 831 Sieburth, J., Smetacek, V., and Lenz, J.: Pelagic ecosystem structure: Heterotrophic compartments of the plankton and their  
832 relationship to plankton size fractions, *Limnol. Oceanogr.*, 23, 1256–1263, <https://doi.org/10.4319/lo.1978.23.6.1256>, 1978.
- 833 Silva, N., Rojas, N., and Fedele, A.: Water masses in the Humboldt Current System: Properties, distribution, and the nitrate  
834 deficit as a chemical water mass tracer for Equatorial Subsurface Water off Chile, *Deep Sea Research Part II: Topical Studies*  
835 *in Oceanography*, 56, 1004–1020, <https://doi.org/10.1016/j.dsr2.2008.12.013>, 2009.
- 836 Smith, M. W., Allen, L. Z., Allen, A. E., Herfort, L., and Simon, H. M.: Contrasting genomic properties of free-living and  
837 particle-attached microbial assemblages within a coastal ecosystem, *Front Microbiol*, 4, 1–20,  
838 <https://doi.org/10.3389/fmicb.2013.00120>, 2013.
- 839 Sobarzo, M. and Djurfeldt, L.: Coastal upwelling process on a continental shelf limited by submarine canyons, Concepción,  
840 central Chile, *J Geophys Res*, 109, 1–20, <https://doi.org/10.1029/2004JC002350>, 2004.
- 841 Sobarzo, M., Bravo, L., Donoso, D., Garcés-Vargas, J., and Schneider, W.: Coastal upwelling and seasonal cycles that  
842 influence the water column over the continental shelf off central Chile, *Prog Oceanogr*, 75, 363–382,  
843 <https://doi.org/10.1016/j.pocean.2007.08.022>, 2007.
- 844 Sosa, O. A., Repeta, D. J., DeLong, E. F., Ashkezari, M. D., and Karl, D. M.: Phosphate-limited ocean regions select for  
845 bacterial populations enriched in the carbon–phosphorus lyase pathway for phosphonate degradation, *Environ Microbiol*, 21,  
846 2402–2414, <https://doi.org/10.1111/1462-2920.14628>, 2019.
- 847 Sosa, O. A., Burrell, T. J., Wilson, S. T., Foreman, R. K., Karl, D. M., and Repeta, D. J.: Phosphonate cycling supports methane  
848 and ethylene supersaturation in the phosphate-depleted western North Atlantic Ocean, *Limnol Oceanogr*, 1–17,  
849 <https://doi.org/10.1002/lno.11463>, 2020.
- 850 Spilling, K., Camarena-Gómez, M. T., Lipssewiers, T., Martinez-Varela, A., Díaz-Rosas, F., Eronen-Rasimus, E., Silva, N., von  
851 Dassow, P., and Montecino, V.: Impacts of reduced inorganic N:P ratio on three distinct plankton communities in the Humboldt  
852 upwelling system, *Mar Biol*, 166, 1–17, <https://doi.org/10.1007/s00227-019-3561-x>, 2019.



- 853 Stefels, J. and Van Boekel, W.: Production of DMS from dissolved DMSP in axenic cultures of the marine phytoplankton  
854 species *Phaeocystis* sp, *Mar Ecol Prog Ser*, 97, 11–18, <https://doi.org/https://www.jstor.org/stable/24833593>, 1993.
- 855 Strub, T., Mesías, J., Montecino, V., Rutllant, J., and Salinas, S.: Coastal ocean circulation off western south america, in: *The*  
856 *global coastal ocean - regional studies and syntheses*, vol. 11, 273–313, 1998.
- 857 Sun, J., Steindler, L., Thrash, J. C., Halsey, K. H., Smith, D. P., Carter, A. E., Landry, Z. C., and Giovannoni, S. J.: One Carbon  
858 Metabolism in SAR11 Pelagic Marine Bacteria, *PLoS One*, 6, 1–12, <https://doi.org/10.1371/journal.pone.0023973>, 2011.
- 859 Sun, J., Mausz, M. A., Chen, Y., and Giovannoni, S. J.: Microbial trimethylamine metabolism in marine environments, *Environ*  
860 *Microbiol*, 21, 513–520, <https://doi.org/10.1111/1462-2920.14461>, 2019.
- 861 Taenzer, L.: *The isotope biogeochemistry of methane produced from the C-P lyase pathway*, Dartmouth College, 2019.
- 862 Tang, K. W., McGinnis, D. F., Ionescu, D., and Grossart, H. P.: Methane production in oxic lake waters potentially increases  
863 aquatic methane flux to air, *Environ Sci Technol Lett*, 3, 227–233, <https://doi.org/10.1021/acs.estlett.6b00150>, 2016.
- 864 Testa, G., Masotti, I., and Farías, L.: Temporal Variability in Net Primary Production in an Upwelling Area off Central Chile  
865 (36°S), *Front Mar Sci*, 5, 1–17, <https://doi.org/10.3389/fmars.2018.00179>, 2018.
- 866 Thornton, D. C. O.: Dissolved organic matter (DOM) release by phytoplankton in the contemporary and future ocean, *Eur J*  
867 *Phycol*, 49, 20–46, <https://doi.org/10.1080/09670262.2013.875596>, 2014.
- 868 Del Valle, D. A. and Karl, D. M.: Aerobic production of methane from dissolved water-column methylphosphonate and sinking  
869 particles in the North Pacific Subtropical Gyre, *Aquatic Microbial Ecology*, 73, 93–105, <https://doi.org/10.3354/ame01714>,  
870 2014.
- 871 Vargas, C. A., Arriagada, L., Sobarzo, M., Contreras, P. Y., and Saldías, G.: Bacterial production along a river-to-ocean  
872 continuum in central Chile: Implications for organic matter cycling, *Aquatic Microbial Ecology*, 68, 195–213,  
873 <https://doi.org/10.3354/ame01608>, 2013.
- 874 Vargas, C. A., Contreras, P. Y., Pérez, C. A., Sobarzo, M., Saldías, G. S., and Salisbury, J.: Influences of riverine and upwelling  
875 waters on the coastal carbonate system off Central Chile and their ocean acidification implications, *J Geophys Res Biogeosci*,  
876 121, 1–16, <https://doi.org/10.1002/2015JG003213>, 2016.
- 877 Wang, Q., Dore, J. E., and McDermott, T. R.: Methylphosphonate Metabolism by *Pseudomonas* sp . Populations Contributes  
878 to the Methane Oversaturation Paradox in an Oxic Freshwater Lake, *Environ Microbiol*, 19, 1–41,  
879 <https://doi.org/10.1111/1462-2920.13747>, 2018.
- 880 Wanninkhof, R.: Relationship between wind speed and gas exchange over the ocean, *J Geophys Res*, 97, 7373–7382,  
881 <https://doi.org/10.1029/92JC00188>, 1992.
- 882 Weber, T., Wiseman, N. A., and Kock, A.: Global ocean methane emissions dominated by shallow coastal waters, *Nat*  
883 *Commun*, 10, 1–10, <https://doi.org/10.1038/s41467-019-12541-7>, 2019.
- 884 Wiesenburg, D. A. and Guinasso, N. L.: Equilibrium Solubilities of Methane, Carbon Monoxide, and Hydrogen in Water and  
885 Sea Water, *American Chemical Society*, 24, 356–360, 1979.



- 886 Worden, A.: Picoeukaryote diversity in coastal waters of the Pacific Ocean, *Aquatic microbial ecology*, 43, 165–175,  
887 <https://doi.org/doi:10.3354/ame043165>, 2006.
- 888 Ye, W. W., Wang, X. L., Zhang, X.-H., and Zhang, G.-L.: Methane production in oxic seawater of the western North Pacific  
889 and its marginal seas, *Limnol Oceanogr*, 65, 1–14, <https://doi.org/10.1002/lno.11457>, 2020.
- 890 Zhang, Y. and Xie, H.: Photomineralization and photomethanification of dissolved organic matter in Saguenay River surface  
891 water, *Biogeosciences*, 12, 6823–6836, <https://doi.org/10.5194/bg-12-6823-2015>, 2015.
- 892 Zhao, L., Lin, L.-Z., Chen, M.-Y., Teng, W.-K., Zheng, L.-L., Peng, L., Lv, J., Brand, J. J., Hu, C.-X., Han, B.-P., Song, L.-  
893 R., and Shu, W.-S.: The widespread capability of methylphosphonate utilization in filamentous cyanobacteria and its  
894 ecological significance, *Water Res*, 217, 1–11, <https://doi.org/10.1016/j.watres.2022.118385>, 2022.

895
